1 **Nutritional Programming Improves Dietary Plant Protein Utilization in Zebrafish *Danio***  
2 ***rerio***

3 Karolina Kwasek<sup>1</sup>, Michal Wojno<sup>1</sup>, Genciana Terova<sup>2</sup>, Vance J. McCracken<sup>3</sup>, Giovanni S.  
4 Molinari<sup>1</sup>, and Federica Iannini<sup>2</sup>

5 <sup>1</sup>Center for Fisheries, Aquaculture, and Aquatic Sciences, School of Biological Sciences,  
6 Southern Illinois University, 1125 Lincoln Drive, Carbondale, IL 62901

7 <sup>2</sup>Department of Biotechnology and Life Sciences, University of Insubria, Via J.H. Dunant, 3-  
8 21100 Varese, Italy 26

9 <sup>3</sup>Department of Biological Sciences, Southern Illinois University Edwardsville, Edwardsville, IL  
10 62026

11

12

13

14

15

16

17

18

19

20

21

22

23

24

25

26

27

28

29 \*Corresponding author: Center for Fisheries, Aquaculture, and Aquatic Sciences, Southern  
30 Illinois University, 1125 Lincoln Drive, Life Science II room 175, Carbondale, IL 62901; email:  
31 [karolina.kwasek@siu.edu](mailto:karolina.kwasek@siu.edu); phone: 618 453 2890.

## 32 Abstract

33 Nutritional Programming (NP) has been shown to counteract the negative effects of dietary plant  
34 protein (PP) by introducing PP at an early age towards enhancement of PP utilization during later  
35 life stages. This study explored the effect of NP and its induction time on growth, expression of  
36 appetite-stimulating hormones, and any morphological changes in the gut possibly responsible  
37 for improved dietary PP utilization. At 3 days post-hatch (dph) zebrafish were distributed into 12  
38 (3 L) tanks, 100 larvae per tank. This study included four groups: 1) The control (NP-FM) group  
39 received fishmeal (FM)-based diet from 13-36 dph and was challenged with PP-based diet  
40 during 36-66 dph; 2) The NP-PP group received NP with dietary PP in larval stage via live food  
41 enrichment during 3-13 dph followed by FM diet during 13-36 dph and PP diet during 36-66  
42 dph; 3) The T-NP group received NP between 13-23 dph through PP diet followed by FM diet  
43 during 23-36 dph and PP diet during 36-66 dph; and 4) The PP group received PP diet from 13-  
44 66 dph. During the PP challenge the T-NP group achieved the highest weight gain compared to  
45 control and PP. *Ghrelin* expression in the brain was higher in T-NP compared to NP-FM and  
46 NP-PP, while in the gut it was reduced in both NP-PP and T-NP groups. *Cholecystokinin*  
47 expression showed an opposite trend to *ghrelin*. The brain *neuropeptide Y* expression was lower  
48 in NP-PP compared to PP but not different with NP-FM and T-NP groups. The highest villus  
49 length to width ratio in the middle intestine was found in T-NP compared to all other groups. The  
50 study suggests that NP induced during juveniles stages improves zebrafish growth and affects  
51 digestive hormone regulation and morphology of the intestinal lining – possible mechanisms  
52 behind the improved PP utilization in pre-adult zebrafish stages.

53

54

## 55 **Introduction**

56 Replacement of fishmeal (FM) in fish diets with plant protein (PP) has been an ongoing  
57 challenge in the aquaculture industry. High-quality PP sources such as soy or pea protein  
58 concentrates and wheat or corn gluten have been widely used by the feed industry since their  
59 digestibility in some species is comparable to FM. However, their price can often exceed the cost  
60 of marine raw materials. Although some progress with utilization of lower-quality PP, such as  
61 soybean meal, has been made, a number of concerns must still be overcome including low  
62 palatability, imbalanced amino acid profile, and a presence of anti-nutritional factors responsible  
63 for inducing intestinal inflammation, to maintain acceptable growth rates and feed efficiency  
64 values at high FM substitution levels. Thus, the aquafeed industry has focused on ways to  
65 include some of the more cost-effective alternative sources of protein that will not only help to  
66 further replace FM but also substitute some of the expensive high-quality PP concentrates and  
67 provide more flexibility in feed formulations using a wider range of available raw materials.

68 Nutritional programming (NP) has been found to be a promising approach to counteract  
69 the negative effects of PP in feeds. NP is a way of modifying or inducing specific physiological  
70 responses during vulnerable early developmental stages of an animal that will help to cope with  
71 specific (environmental) challenges in the animal later in (adult) life. NP in fish only recently has  
72 received more attention and some studies already indicate it is possible to “program” fish during  
73 their young age with alternative raw materials or nutrient levels to allow them to utilize different  
74 dietary compounds more efficiently later in their life. Geurden et al. [1] first found that juvenile  
75 rainbow trout *Oncorhynchus mykiss* subjected to PP-based diet during the first three weeks of  
76 life showed improved acceptance and utilization of the same dietary PP-based diet when given  
77 during later life stages. Furthermore, two other studies reported that early exposure of young

78 European seabass *Dicentrarchus labrax* to diets deficient in long-chain polyunsaturated fatty  
79 acids induced higher expression of delta-6 desaturase mRNA levels in juveniles – the rate-  
80 limiting enzyme involved in biosynthesis of highly unsaturated fatty acids [2,3]. Other studies  
81 also point out the importance of maternal NP and its impact on the well-being of progeny.  
82 Izquierdo et al. [4] found that it is possible to achieve improved growth of 4-month old gilthead  
83 seabream *Sparus aurata* juveniles fed low FM and low fish oil diets by previously exposing the  
84 broodstock of those fish to high vegetable-based oil feeds. Moreover, these authors later showed  
85 that the same fish at 16-month of age were still able to grow on low FM/fish oil diets better  
86 compared to control group suggesting positive long-term effect of NP on utilization of vegetable-  
87 based diet [5]. Finally, NP with soybean meal-based diets has been recently shown to  
88 successfully adapt yellow perch *Perca flavescens* to utilize the same soybean meal diet during  
89 adult stages, leading to better growth compared to yellow perch that were not exposed to soybean  
90 meal diet during the early developmental stage [6]. Most of the NP studies on fish focus,  
91 however, on NP with PP induced during fish juvenile stages. Perera and Yufera [7] attempted to  
92 nutritionally program zebrafish *Danio rerio* in its larval stage with soybean meal-based feeds at  
93 first feeding but no improvement in the growth of pre-adult fish was reported, likely due to poor  
94 dry feed intake at the NP stage. It is therefore critical to understand if an optimal timing exists  
95 for NP to take effect and improve the capacity of the fish to utilize PP for growth in later life  
96 stages. Zebrafish requires live food feeding during the first days of live for proper growth,  
97 development, and survival, and therefore NP of larval fish with dry feed poses a high risk of  
98 limited feed intake leading to possibly confounding results. We believe that live food can be used  
99 as a vector to induce NP during these very early developmental stages.

100           Although NP has a great potential to improve fish growth and health performance during  
101 the grow-out phase, the mechanism behind the NP phenomenon remains elusive. Flavor  
102 experiences during early life stages have been shown to be a driver for life-long flavor  
103 acceptance in adults' life. For example, citric acid, which has a sour/bitter taste, is known to be  
104 an instinctively aversive substance for rats. However, rats exposed/programmed to citric acid  
105 during nursing showed increased voluntary ingestion of citric acid compared to rats that were not  
106 exposed to citric acid at all [8]. Similarly, Balasubramanian et al. [9] indicated that early PP diet  
107 exposure in rainbow trout might mediate feed acceptance of the same diet at a later life stage by  
108 affecting pathways regulating the sensory perception of taste, odor, and vision. If improved  
109 dietary PP utilization induced by NP is a result of improved palatability towards dietary PP, can  
110 the negative effects of anti-nutritional factors present in PP still induce morphological changes in  
111 fish digestive tract as seen in other studies [10-13]? Dietary PP, such as soybean meal, have been  
112 associated with many cases of intestinal inflammation in several fish species limiting their  
113 dietary inclusion rates [7,10,14-18]. Some of the typical signs of dietary PP-induced  
114 inflammation in the intestinal mucosa include shortening of the mucosal folds which decrease  
115 the capacity of the digestive tract to digest, absorb, and utilize nutrients consequently affecting  
116 fish growth and health by diminishing their response to pathogens [19]. Nutritional programming  
117 has been shown to improve dietary PP utilization, including soybean meal; whether this process  
118 is driven solely by increased palatability and therefore improved feed intake, or by specific  
119 intestinal responses to dietary PP that lead to morphological adaptations remains unknown. We  
120 believe that NP with dietary PP alters the gut epithelial lining and consequently increases fish  
121 resistance to negative side-effects of PP, thereby improving fish ability to cope with those  
122 alternative raw materials.

123 Fish gastrointestinal tract is characterized by certain amount of plasticity dependent on  
124 various signaling pathways which allow the gut to adapt to rapid shifts in environmental  
125 conditions including a diet [20]. Some of these signals are based on hormones that can be  
126 divided into two groups: those that induce (orexigenic), and those that inhibit (anorexigenic)  
127 appetite and food consumption. Peripheral signals originate in the gastrointestinal tract, liver,  
128 adipose tissue, and others, and reach the brain through both endocrine and neuroendocrine  
129 actions. The hypothalamus is considered the center that controls appetite and energy balance and  
130 integrates the different chemical (nutrient levels), mechanical (feed volume in the gut), and  
131 endocrine signals [21]. If improved taste is in fact the key driver for improved growth  
132 performance in previously “programmed” fish, we would expect to observe differential  
133 expression of digestive hormones responsible for appetite control after exposure to dietary PP  
134 between adult fish that were exposed to PP in their early age and those that were not. Therefore,  
135 the objectives of our study were: 1) To determine the effect of NP on dietary PP utilization in  
136 zebrafish; 2) To determine the effect of different NP induction times on dietary PP utilization; 3)  
137 To determine if NP induces any morphological changes in the gut responsible for improved  
138 digestion of dietary PP; and 4) To assess if NP with dietary PP affects the expression of appetite-  
139 stimulating hormones possibly responsible for enhanced dietary PP utilization.

140 The experiment was conducted with zebrafish since it is considered an established model  
141 species for various research areas including genetics, nutrition, biomedicine, and toxicology;  
142 additionally, its popularity is now growing in the aquaculture research field [22]. It is an  
143 omnivorous teleost species that can utilize both plant and animal protein sources efficiently for  
144 growth serving as a great model for assessment of nutritional pathways in carnivorous and  
145 herbivorous aquaculture species [22].

## 146 **Materials and Methods**

147           The feeding trial was conducted in the Center for Fisheries, Aquaculture, and Aquatic  
148 Sciences at Southern Illinois University-Carbondale (SIUC), IL. All experiments were approved  
149 by the Institutional Animal Care and Use Committee (IACUC) of SIUC.

### 150 ***Experimental fish***

151           All experiments were carried using recirculated aquaculture system (Pentair Aquatic Eco-  
152 systems, Cary, NC) consisting of biofilter, carbon filter, UV light, and pH/conductivity  
153 automatic adjustment feature. The experimental culture system used reversed osmosis as the  
154 main water source where pH and conductivity were maintained at optimal levels of  $6.9\pm 0.2$  and  
155  $1584\pm 27$   $\mu\text{S}$ , respectively. The average water temperature throughout the feeding trial was  $27.1$   
156  $\pm 0.2$  °C. The photoperiod consisted of 14 hours of darkness and 10 hours of light, with the  
157 overhead lights on from 8:00-18:00.

158           Zebrafish broodstock was obtained from a local pet store (Petco, Carbondale, IL). Males  
159 and females were kept in separate tanks and fed 2-3 times a day with commercial feed (Otohime,  
160 Japan) and *Artemia* nauplii for two weeks before breeding. Fish were combined for breeding in a  
161 2:1 ratio of females to males. A wire net with a 1.5 mm mesh was placed in breeding tank with  
162 artificial plants to induce spawning. The fish were left to breed for 24 hours. The broodstock was  
163 then removed after spawning on the next day. The wire mesh was taken out, and eggs hatched  
164 approximately 48 hours at 27 °C. At 3 days post-hatch (dph) after mouth opening and when the  
165 larvae started actively swimming, they were randomly distributed into experimental tanks.

166           Zebrafish were fed with rotifers *Brachionus plicatilis* only for the first two days after the  
167 swim up stage (3-4 dph). The rotifers were obtained from cysts purchased from a commercial

168 vendor (Brine Shrimp Direct, Ogden, Utah). Starting at 5 dph all fish received *Artemia* nauplii  
169 obtained from hatching of cysts from a commercial source (GSL Brine Shrimp, Ogden, Utah)  
170 together with rotifers (5-7 dph) and then *Artemia* nauplii only from 8-13 dph. All groups were  
171 fed *ad libitum* throughout the study.

## 172 ***Experimental diets***

173 All the experimental feeds were formulated and produced at SIUC. Two experimental  
174 diets were tested: a diet based on soybean meal and soy protein concentrate as main protein  
175 sources replacing 80% of marine animal protein (PP diet; the soy concentrate was included to  
176 adjust dietary crude protein while leaving room for other ingredients in the formulation,  
177 including a minimum level of starch to allow expansion and floatability of the experimental  
178 diets); and a diet based on fishmeal as a main protein source (FM diet). Both diets were  
179 formulated to be isonitrogenous (49% crude protein) and isolipidic (10% lipid) (Table 1).

180 Table 1. Dietary formulation (g/100 g) of experimental diet.

| <b>Ingredients</b>                   | <b>FM-diet</b> | <b>PP-diet</b> |
|--------------------------------------|----------------|----------------|
| Fish meal <sup>1</sup>               | 63.7           | 0              |
| Soybean meal <sup>2</sup>            | 0.0            | 45.5           |
| Soy protein concentrate <sup>3</sup> | 0.0            | 16.0           |
| Krill Meal <sup>4</sup>              | 10.0           | 10.0           |
| CPSP <sup>5</sup>                    | 5.0            | 5.0            |
| Dextrin <sup>3</sup>                 | 5.4            | 0.0            |
| Fish Oil <sup>6</sup>                | 4.2            | 7.8            |
| Soy Lecithin <sup>6</sup>            | 5.0            | 5.0            |
| Mineral mix <sup>3</sup>             | 2.5            | 2.5            |
| CaHPO <sub>4</sub> <sup>7</sup>      | 0.0            | 1.5            |
| Vitamin mix <sup>3</sup>             | 2.0            | 2.0            |
| Vitamin C <sup>8</sup>               | 0.1            | 0.1            |
| Choline chloride <sup>3</sup>        | 0.1            | 0.1            |
| Methionine <sup>3</sup>              | 0.0            | 0.5            |
| Lysine <sup>3</sup>                  | 0.0            | 2.0            |



|     |                        |            |            |
|-----|------------------------|------------|------------|
| 181 | Threonine <sup>3</sup> | 0.0        | 0.1        |
|     | Taurine <sup>3</sup>   | 1.0        | 1.0        |
|     | Guar Gum <sup>3</sup>  | 1.0        | 1.0        |
|     | <b>Sum</b>             | <b>100</b> | <b>100</b> |

182 <sup>1</sup>Omega Protein, Reedville, VA, USA

183 <sup>2</sup>Premium Feeds, Perryville, MO, USA

184 <sup>3</sup>Dyets Inc, Bethlehem, PA, USA

185 <sup>4</sup>Florida Aqua Farms, Dade City, FL

186 <sup>5</sup>Soluble fish protein concentrate, Sopropêche, France

187 <sup>6</sup>MP Biomedicals, Solon, OH, USA

188 <sup>7</sup>Acros Organics, NJ, USA

189 <sup>8</sup>Argent Aquaculture, Redmond, WA, USA

190

191 All dry protein ingredients (fishmeal, krill meal, and soybean meal) were added to a  
192 centrifugal mill (Retsch Haan, Germany) and ground to 0.5 micrometers. After the grinding  
193 process, all ingredients were manually sieved through a 0.25-micrometer sieve to ensure all  
194 particles were of the appropriate and uniform size. All the dry ingredients (excluding soy lecithin  
195 and choline chloride) were added together and mixed for 15 minutes and the fish oil was then  
196 added with the soy lecithin dissolved in the oil. The oil and dry ingredients were mixed again for  
197 15 minutes. Finally water (~10-15% of total mass of feed) was added with dissolved choline  
198 chloride. Feeds were then slowly added to the extruder (Caleva Extruder 20, Sturminster Newton  
199 Dorset, England) at levels between 20-24 rpm to obtain a proper extrudate size and firmness.  
200 Extrudates were then processed using a spheronizer (Caleva, Sturminster Newton Dorset,  
201 England) at 600 rpm for 3 min, 1800 rpm for 30 seconds, and then 600 rpm for 2-5 minutes to  
202 finish the process. Finally, the extrudates were dried using a freeze dryer (Labconco, Kansas  
203 City, MO). All dried pellets were sieved to appropriate sizes using a vibratory sieve shaker  
204 (Retsch Hann, Germany). All finished feeds were stored in bags at -20°C. While the feeds were  
205 being used in experimentation, they were kept at 4°C.

206 ***Experimental design***

207 At 3 dph zebrafish larvae were randomly distributed into 12 (3 L) tanks, 100 larvae per  
208 tank. The study lasted until fish reached 66 dph. Four different feeding regimes were  
209 investigated: 1) The first group received FM-based diet after the live food period from 13-36 dph  
210 and was challenged with PP-based diet between 36-66 dph (control, NP-FM); 2) The second  
211 group received NP with dietary PP in the early larval stage via live food enrichment during 3-13  
212 dph followed by fishmeal (FM)-based diet during 13-36 dph and PP-based diet during 36-66 dph  
213 (NP-PP); 3) The third group received NP with dietary PP between 13-23 dph through formulated  
214 diet after the live food period followed by FM-based diet during 23-36 dph and PP-based diet  
215 during 36-66 dph (T-NP); and 4) The fourth group received PP-based diet after the live food  
216 period from 13-66 dph (negative control; PP) (Figure 1).

217 **Fig 1. Dietary treatment regimens tested in the study.**

218 NP – nutritional programming, FM – fishmeal, PP – plant protein, SBM – soybean meal.

219  
220 For the NP of the NP-PP group an enrichment of the live food was prepared with soybean  
221 meal. Both rotifers and *Artemia* nauplii were enriched by adding previously sieved finely ground  
222 soybean meal (<0.15mm) into the water of the rotifer or *Artemia* culture for a minimum of 3  
223 hours prior to fish feeding (Figure 2). All the other groups (NP-FM, T-NP, and negative control)  
224 received live food enriched with *Spirulina* algae (Earthrise, Irvine, CA) using the same  
225 enrichment procedure.

226 **Fig 2. Rotifers after 2 hours of enrichment with *Spirulina* or ground, blended, and sieved  
227 soybean meal.**

228 ***Measured responses***

229 At the end of the feeding trial, fish in each tank were counted and weighed. The  
230 following quantified growth performance parameters were assessed:

- 231 - Survival (%) =  $100 \times (\text{final number of fish}/\text{initial number of fish})$
- 232 - Final Weight (g) = Final body weight – initial body weight
- 233 - Weight gain (% of initial weight) =  $100 \times (\text{final body weight} - \text{initial body}$
- 234  $\text{weight})/\text{initial body weight}$ .

235 At the beginning (NP phase), in the middle (control phase), and at the end of the trial (PP

236 challenge) feed intake was assessed by measuring the amount of feed that was consumed in one

237 meal in each tank (feeding was ceased when fish showed signs of feed rejection).

238 At the end of the study, samples of fish were taken 3 hours (postprandial levels) and 24

239 hours (physiological baseline) after feeding from each group and preserved in RNALater®

240 (Sigma-Aldrich, St Louis, MO) to assess the expression of digestive hormones. In addition,

241 three fish from each tank were sampled, their digestive tracts were dissected and preserved in

242 10% buffered formalin for histological evaluation of the intestinal villi.

### 243 ***Digestive hormone analysis***

244 The digestive hormones gene expression analysis was conducted in the laboratory of

245 Animal Biotechnology and Aquaculture of the Department of Biotechnologies and Life Sciences

246 at University of Insubria, Varese, Italy.

### 247 ***Total RNA extraction and cDNA synthesis***

248 Total RNA was extracted from zebrafish brain and intestine samples using an automatic

249 system (Maxwell® 16 Instrument, Promega) and a total RNA purification kit (Maxwell® 16

250 LEV simplyRNA Tissue). The extracted RNA was quantified by measuring the absorbance at

251 260 nm using NanoDrop™ 2000c spectrophotometer (Thermo Scientific) and reverse transcribed

252 into cDNA following the protocol described in the SuperScript III Reverse Transcriptase kit  
253 (Invitrogen, Milan, Italy)

#### 254 ***Primer design and amplification of gene target***

255 The primers for the amplification of *ghrelin*, *leptin*, *cholecystokinin (CCK)*, *orexin*, and  
256 *neuropeptide Y (NPY)* genes were designed based on the cDNA sequences of these genes in  
257 *Danio rerio* available in GenBank database. The accession numbers of the sequences are  
258 **AM055940.1** for *ghrelin*, **BN000830.1** for *leptin*, **XM\_001346104.6** for *CCK*, **NM\_001077392**  
259 for *orexin*, and **BC162071.1** for *NPY* gene. The primer sequences are listed in Table 2.

260 Table 2. Primers used for the molecular cloning of target genes.

| <b>Gene</b>    | <b>Primer</b> | <b>Nucleotide sequence (5'- 3')</b> |
|----------------|---------------|-------------------------------------|
| <i>Ghrelin</i> | Forward       | GCATGTTTCTGCTCCTGTGTG               |
|                | Reverse       | AGATTCTGAAGCACGGGACC                |
| <i>Leptin</i>  | Forward       | CGCTGACAAACCCATCCAAG                |
|                | Reverse       | CAGCTGGTCCAGATTATCGATCA             |
| <i>CCK</i>     | Forward       | CAGCTCTCTCTGCGTCTCTG                |
|                | Reverse       | TGCGGTATGAGCCTTTGGTT                |
| <i>Orexin</i>  | Forward       | TCCAGGTGCTCGTCTTCATG                |
|                | Reverse       | CTCCAGCCTCTTCCCCATTG                |
| <i>NPY</i>     | Forward       | AAGATGTGGATGAGCTGGGC                |
|                | Reverse       | TGGCATGGTGATCTCATCCAC               |

261

#### 262 ***Molecular cloning and sequencing***

263 An aliquot of cDNA obtained by reverse transcription was amplified in a PCR reaction  
264 with GoTaq Green Master Mix (Promega, Milan, Italy). For each pair of primers, 25 PCR  
265 amplification cycles were set using the T100 Thermal Cycler (BioRad, Milan, Italy)

266 thermocycler. The amplification product was then loaded onto 1% agarose gel with ethidium  
267 bromide in TAE 1X buffer to verify the length of amplicon. The bands of interest were extracted  
268 from the gel, and then purified using the NucleoSpin® Gel and PCR Clean-up kit (Macherey-  
269 Nagel Milan, Italy). For each target gene, a ligation reaction was performed between the  
270 pGEM®-T Easy plasmid (Promega Milan, Italy) and the amplicon purified. Briefly, to achieve  
271 optimal ligation efficiency, the necessary quantity of insert was calculated using the following  
272 equation:

$$273 \quad \text{ng of insert} = \left[ \frac{\text{ng of vector} \times \text{kb size of insert}}{\text{kb size of vector}} \times \text{insert :vector molar ratio} \right]$$

274 Then, following the protocol of the pGEM®-T and pGEM®-T kit, Easy Vector Systems  
275 (Promega, Italy), a mix was prepared containing: the insert, 5 µL of 2X Rapid Ligation Buffer, 1  
276 µL of pGEM®-T Easy vector (50 ng), 1 µL of T4 DNA ligase (3U/µL) and water up to a final  
277 volume of 10 µL. The solution was left at 4°C overnight. The following day a transformation  
278 was carried out with highly competent E. coli JM109 (Promega) cells, which were added to the  
279 ligation solution, subjected to thermal shock (42 °C) for 45 seconds and allowed to grow in LB  
280 medium (Luria Broth) for 90 min.

281 Finally, the transformed cells were plated and grown overnight at 37°C. By means of  
282 white-blue screening it was possible to discriminate the colonies containing the vector, which  
283 were taken and subjected to a PCR reaction to check the presence of the insert of interest.  
284 Positive colonies were inoculated in liquid medium and left overnight in a shaker at 37 °C. The  
285 next day, the plasmid was purified using the NucleoSpin® Plasmid kit (Macherey-Nagel, Milan,  
286 Italy) from 4mL of culture, following the protocol provided by the manufacturer. The plasmids

287 were evaluated on a 1% agarose gel and displayed on transilluminator (BioRad city, country).

288 The amplification products were finally sequenced in both directions (T7 and SP6).

### 289 ***Quantitative real-time RT-PCR***

#### 290 ***Generation of in vitro-transcribed mRNAs for target genes***

291 Based on the cDNA sequences of zebrafish *ghrelin*, *leptin*, *CCK*, *orexin*, and *NPY* genes,  
292 sequenced as aforementioned, a forward and a reverse primer were designed for each target gene  
293 (Table 3). The forward primers were engineered to contain at the 5' end the sequence of the T3  
294 RNA polymerase promoter. The T3 RNA polymerase encoded by bacteriophages T3 is a DNA-  
295 dependent RNA polymerase that catalyzes the formation of RNA in the 5'→3' direction after the  
296 viruses infect their host. The sequence of the T3 RNA polymerase promoter is necessary for the  
297 in vitro transcription of the mRNAs of each target gene to be used as standard in the subsequent  
298 quantification of the same gene in the biological samples. The T3 forward primers and their  
299 respective reverse primers were used in a conventional PCR reaction starting from plasmid.  
300 Then, the PCR product was checked on 1% agarose gel with ethidium bromide, purified with the  
301 NucleoSpin® Gel and PCR Clean-up kit (Macherey-Nagel, Italy) and subsequently sequenced.

302 Table 3. Primers used for the synthesis of standard mRNAs

| <b>Gene</b>    | <b>Primer</b> | <b>Nucleotide sequence (5'-3')</b>         |
|----------------|---------------|--------------------------------------------|
| <i>Ghrelin</i> | T3 Forward    | caattaaccctcactaaagggGCATGTTTCTGCTCCTGTGTG |
|                | Reverse       | AGATTCTGAAGCACGGGACC                       |
| <i>Leptin</i>  | T3 Forward    | caattaaccctcactaaagggCGCTGACAAACCCATCCAAG  |
|                | Reverse       | CAGCTGGTCCAGATTATCGATCA                    |
| <i>CCK</i>     | T3 Forward    | caattaaccctcactaaagggCAGCTCTCTCTGCGTCTCTG  |
|                | Reverse       | TGCGGTATGAGCCTTTGGTT                       |
| <i>Orexin</i>  | T3 Forward    | caattaaccctcactaaagggTCCAGGTGCTCGTCTTCATG  |

|            |            |                                           |
|------------|------------|-------------------------------------------|
|            | Reverse    | CTCCAGCCTCTTCCCCATTG                      |
| <i>NPY</i> | T3 Forward | caattaaccctcactaaagggAAGATGTGGATGAGCTGGGC |
|            | Reverse    | TGGCATGGTGATCTCATCCAC                     |

303

304 Sequencing was necessary both to confirm the presence of the T7 promoter and to count  
305 the number of nucleotides present for the subsequent calculation of the molecular weight (MW -  
306 molecular weight) of each standard determined using the following formula:  $MW = [(n^{\circ} \text{ of bases}$   
307  $A \times 329.2) + (n^{\circ} \text{ of bases U} \times 306.2) + (n^{\circ} \text{ of bases C} \times 305.2) + (n^{\circ} \text{ of bases G} \times 345.2)] + 159$ .

308 In vitro transcription was performed using T3 RNA polymerase and other reagents  
309 supplied in the RiboProbe In Vitro Transcription System kit (Promega, Italy) according to the  
310 manufacturer's protocol. The concentration of the mRNAs thus obtained was measured by  
311 reading the absorbance at 260 nm by means of NanoDrop™ 2000c (Thermo Scientific). By  
312 knowing the molecular weight and the concentration of each mRNA it was possible to determine  
313 the number of molecules/ $\mu\text{L}$  for each target gene.

#### 314 ***Generation of standard curves***

315 The synthetic mRNAs of each gene were used as quantitative standards in the analysis of  
316 experimental samples. Defined amounts of mRNAs at 10-fold dilutions were amplified via real-  
317 time PCR using iTaq™ Universal SYBR® Green One-Step kit (Bio-Rad, Italy) using the  
318 following RT-PCR conditions: 10 min at 50°C (reverse transcription reaction), 1 min at 95°C,  
319 and 40 cycles consisting of 10 s at 95°C and 30 s at 60°C. The Ct values obtained by such  
320 amplification were used to create a standard curve for each of the target genes.

#### 321 ***Real-time RT-PCR for quantification***

322 One hundred nanograms of total RNA extracted from the experimental samples were  
323 amplified via One-step SYBR® Green quantitative real-time RT-PCR, in the same plate with 10-  
324 fold-diluted defined amounts of standard mRNA. The sequences of primers used for target gene  
325 amplification are shown in Table 4. SYBR® Green PCR reactions were performed on a Bio-  
326 Rad® CFX96™ System.

327 Table 4. Primers and probes used for one-step SYBR® Green real-time RT-PCR

| <b>Gene</b>    | <b>Primer</b> | <b>Nucleotide sequence (5' - 3')</b> |
|----------------|---------------|--------------------------------------|
| <i>Ghrelin</i> | Forward       | GTGTCTCGAGTCTGTGAGCG                 |
|                | Reverse       | CAGCTTCTCTTCTGCCCACT                 |
| <i>Leptin</i>  | Forward       | TGTTGACCAGATACGCCGAG                 |
|                | Reverse       | GTCCAGCGCTTTCCCATTTG                 |
| <i>CCK</i>     | Forward       | G TTCAGTCTAATGTCGGCTCC               |
|                | Reverse       | TAGTTCGGTTAGGCTGCTGC                 |
| <i>Orexin</i>  | Forward       | CTACGAGATGCTGTGCCGAG                 |
|                | Reverse       | GAGTGAGAATCCCGACAGCG                 |
| <i>NPY</i>     | Forward       | TGGGGACTCTCACAGAAGGG                 |
|                | Reverse       | AATACTTGGCGAGCTCCTCC                 |

328  
329 Data from the real time PCR runs were collected with CFX™ Software. Cycle threshold  
330 (Ct) values corresponded to the number of cycles at which the fluorescence emission monitored  
331 in real time exceeded the threshold limit. The Ct values of the standard mRNAs amplification  
332 were used to create standard curves, which were then used for the calculation of the copies of  
333 mRNAs in the biologic samples.

### 334 *Histological analyses*



335           The intestines previously fixed in 10% neutral buffered formalin were processed to  
336 paraffin using a Sakura enclosed automated tissue processor (Netherlands). The three  
337 representative areas of zebrafish intestines were orientated for cross sections embedded together  
338 in the same block. Five micrometer serial sections were cut with a Leica manual microtome  
339 (Buffalo Grove, IL) and placed on water bath at 44°C. Sections were placed on positive charged  
340 slides. After drying, the slides were stained with hematoxylin and eosin and cover-slipped using  
341 acrylic mounting media. The histological analysis of the mid-gut portions of fish digestive tract  
342 focused on the tissue sections of medium diameter. Pictures of the samples were taken at 100x  
343 magnification using a microscope (Nikon SMZ1500, Japan) and a camera (Nikon Digital Sight,  
344 Japan).

345           To obtain villus length and width, pictures of each slide were obtained using a  
346 microscope (Leica DMI 300B) and camera (Leica DMC 290) combination, with the software  
347 LAS V4.4 (Leica Camera, Wetzler, Germany). From these pictures, individual lengths and  
348 widths were taken of intact villi using ImageJ (NIH, Bethesda, MD, USA). Length and width  
349 data were measured according to Karimi and Zhandi [23] in the three different segments of the  
350 intestine; proximal, middle, and distal. Villi length was measured from the tip of the villus to the  
351 luminal surface, and villi width was measured across the base of the villus at the luminal surface.  
352 The length-to-width ratio of each villus was determined by dividing the length by the width.

### 353 *Statistical analyses*

354           Results are presented as means  $\pm$  standard deviation. One-way ANOVA was used  
355 followed by Tukey's test using the software R. Differences with  $p$  values  $<.05$  were considered  
356 significant.

## 357 **Results**

### 358 ***Growth performance***

359 At the end of the study the lowest average weight was achieved by the PP group  
360 compared to all other groups. No differences were detected in average weight between NP-FM,  
361 NP-PP, or T-NP groups (Table 5).

Table 5. Dietary treatment effect on growth performance. Values are presented as means ( $\pm$  std. dev). Superscript letters indicate statistical significance between groups. The significance was determined using a One-Way ANOVA and a Tukey Test with a p value  $<0.05$ .

|                      | <b>NP-FM</b>                      | <b>NP-PP</b>                      | <b>T-NP</b>                      | <b>PP</b>                        |
|----------------------|-----------------------------------|-----------------------------------|----------------------------------|----------------------------------|
| Avg. Weight (g)      | 0.37 <sup>a</sup> ( $\pm$ 0.04)   | 0.36 <sup>a</sup> ( $\pm$ 0.05)   | 0.42 <sup>a</sup> ( $\pm$ 0.03)  | 0.26 <sup>b</sup> ( $\pm$ 0.03)  |
| Avg. Weight Gain (g) | 0.29 <sup>a</sup> ( $\pm$ 0.03)   | 0.28 <sup>a</sup> ( $\pm$ 0.03)   | 0.34 <sup>a</sup> ( $\pm$ 0.03)  | 0.20 <sup>b</sup> ( $\pm$ 0.03)  |
| Weight Gain (%)      | 353.8 <sup>ab</sup> ( $\pm$ 14.7) | 404.0 <sup>ac</sup> ( $\pm$ 45.1) | 430.3 <sup>c</sup> ( $\pm$ 34.6) | 364.6 <sup>b</sup> ( $\pm$ 29.9) |

362

363 During the PP challenge the T-NP group achieved the highest weight gain compared to  
364 both control groups NP-FM and PP. The NP-PP group achieved higher weight gain compared to  
365 the negative control; however, no differences were detected with NP-FM or T-NP groups. No  
366 differences in the feed intake were detected during NP phase, control feeding phase, or PP  
367 challenge. Similarly, no differences were found in the survival ( $\sim$ 50% assessed for the trial  
368 duration from 3 until 66 dph) between the different dietary regimes.

### 369 ***Digestive hormones expression***

370 At the end of the study expression of digestive hormones was measured in the gut and/or  
371 brain 3 and 24-hours after feeding representing postprandial and basal levels, respectively.  
372 *Ghrelin* expression in the brain was significantly higher in the T-NP group compared to NP-FM  
373 and NP-PP groups but not different with the PP group. *Ghrelin* expression in the gut was

374 significantly reduced in both NP-PP and T-NP groups compared to the other groups. No  
375 differences were detected in the gut *ghrelin* expression between NP-PP and T-NP nor between  
376 NP-FM and PP groups (Figure 3).

377 **Fig 3. Ghrelin expression in the brain and gut.**

378 The expression of *ghrelin* presented as number of *ghrelin* transcript copies per ng of total RNA  
379 in zebrafish brain and gut at 3-hours (B) and 24-hours (A) after feeding. The fold change  
380 presents the difference in *ghrelin* transcript copies between 3 and 24-hour samples. Different  
381 letters indicate statistical difference at  $p < 0.05$ .

382 *CCK* expression in the brain was significantly reduced in NP-PP and T-NP compared PP  
383 group but not different with NP-FM. *CCK* expression in the gut showed a similar trend, levels  
384 were lower in NP-PP and T-NP groups compared to PP but no difference was detected between  
385 T-NP and NP-FM (Figure 4).

386 **Fig 4. CCK expression in the brain and gut.**

387 The expression of *CCK* presented as number of *CCK* transcript copies per ng of total RNA in  
388 zebrafish brain and gut at 3-hours (B) and 24-hours (A) after feeding. The fold change presents  
389 the difference in *CCK* transcript copies between 3 and 24-hour samples. Different letters indicate  
390 statistical difference at  $p < 0.05$ .

391 *Leptin* expression in the brain and gut was not different between groups 3-hours after  
392 feeding, but the level of *leptin* mRNA in T-NP fish 3-hours after feeding in the gut was lower  
393 compared to 24-hour sampled fish (Figure 5).

394 **Fig 5. Leptin expression in the brain and gut.**

395 The expression of *leptin* presented as number of *leptin* transcript copies per ng of total RNA in  
396 zebrafish brain and gut at 3-hours (B) and 24-hours (A) after feeding. The fold change presents  
397 the difference in *leptin* transcript copies between 3 and 24-hour samples. Different letters  
398 indicate statistical difference at  $p < 0.05$ .

399 No significance was detected in *orexin* expression in the brain nor the gut. However, an  
400 interesting trend was observed showing numerically higher expression level of brain *orexin* in T-

401 NP and PP compared to the other groups ( $p > 0.05$ ). A similar trend was also seen in the gut but  
402 no significant differences were actually detected (Figure 6).

403 **Fig 6. Orexin expression in the brain and gut.**

404 The expression of *orexin* presented as number of *orexin* transcript copies per ng of total RNA in  
405 zebrafish brain and gut at 3-hours (B) and 24-hours (A) after feeding. The fold change presents  
406 the difference in *orexin* transcript copies between 3 and 24-hour samples. Different letters  
407 indicate statistical difference at  $p < 0.05$ .

408 *NPY* expression in the brain was significantly lower in the NP-PP compared to PP group  
409 but not different with NP-FM and T-NP groups (Figure 7).

410 **Fig 7. NPY expression in the brain.**

411 The expression of *NPY* presented as number of *NPY* transcript copies per ng RNA in zebrafish  
412 brain 3-hours (B) and 24-hours (A) after feeding. The fold change presents the difference in *NPY*  
413 transcript copies between 3 and 24-hour samples. Different letters indicate statistical difference  
414 at  $p < 0.05$ .

415 **Intestinal villi**

416 The length of intestinal villi in the proximal intestine was the highest in NP-FM group  
417 compared to all other groups. The villi width was found higher in NP-FM group compared to PP  
418 and T-NP groups but not different with NP-PP. In the middle intestine, however, the T-NP fish  
419 displayed higher villi length compared to PP group and not different compared to NP-FM and  
420 NP-PP groups. Finally, in the distal portion the T-NP group had the highest villi length compared  
421 to NP-PP and PP groups and not different with NP-FM group. No differences were detected in  
422 villi width in the middle or distal intestine.

423 The highest villus length to villus width ratio in the proximal intestine was found in T-NP  
424 compared to both NP-PP and PP groups and not different with NP-FM group. In the middle  
425 intestine the T-NP group had the highest villus length to width ratio compared to all other groups

426 and no differences were detected between NP-FM, NP-PP, and PP groups. No differences were  
 427 detected among groups in the length to villus ratio in the distal intestine (Table 6).

428 Table 6. Treatment effect on intestinal villi length, width, and length to width ratio. Units for villi  
 429 length and width are  $\mu\text{m}$ . Values are presented as means ( $\pm$  std. dev). Superscript letters indicate  
 430 statistical significance between groups. The significance was determined using a One-Way  
 431 ANOVA and a Tukey Test with a  $p$  value  $<0.05$ .

| Intestinal Segment | Group                               |                                     |                                    |                                     |
|--------------------|-------------------------------------|-------------------------------------|------------------------------------|-------------------------------------|
|                    | NP-FM                               | NP-PP                               | T-NP                               | PP                                  |
| <b>Proximal</b>    |                                     |                                     |                                    |                                     |
| Length             | 314.47 <sup>b</sup> ( $\pm$ 58.14)  | 213.12 <sup>a</sup> ( $\pm$ 47.64)  | 221.93 <sup>a</sup> ( $\pm$ 72.21) | 188.24 <sup>a</sup> ( $\pm$ 60.22)  |
| Width              | 112.18 <sup>c</sup> ( $\pm$ 42.21)  | 91.60 <sup>bc</sup> ( $\pm$ 22.79)  | 67.70 <sup>a</sup> ( $\pm$ 13.40)  | 79.43 <sup>ab</sup> ( $\pm$ 17.80)  |
| Ratio              | 3.16 <sup>ab</sup> ( $\pm$ 1.30)    | 2.43 <sup>a</sup> ( $\pm$ 0.66)     | 3.37 <sup>b</sup> ( $\pm$ 1.24)    | 2.45 <sup>a</sup> ( $\pm$ 0.91)     |
| <b>Middle</b>      |                                     |                                     |                                    |                                     |
| Length             | 130.19 <sup>ab</sup> ( $\pm$ 13.87) | 129.84 <sup>ab</sup> ( $\pm$ 31.74) | 156.64 <sup>b</sup> ( $\pm$ 33.71) | 121.97 <sup>a</sup> ( $\pm$ 22.25)  |
| Width              | 70.09 ( $\pm$ 23.91)                | 68.89 ( $\pm$ 22.86)                | 56.92 ( $\pm$ 11.73)               | 69.89 ( $\pm$ 14.98)                |
| Ratio              | 2.07 <sup>a</sup> ( $\pm$ 0.78)     | 1.99 <sup>a</sup> ( $\pm$ 0.59)     | 2.84 <sup>b</sup> ( $\pm$ 0.72)    | 1.80 <sup>a</sup> ( $\pm$ 0.40)     |
| <b>Distal</b>      |                                     |                                     |                                    |                                     |
| Length             | 160.92 <sup>bc</sup> ( $\pm$ 21.99) | 106.41 <sup>a</sup> ( $\pm$ 25.75)  | 182.21 <sup>c</sup> ( $\pm$ 43.33) | 130.62 <sup>ab</sup> ( $\pm$ 52.30) |
| Width              | 86.33 ( $\pm$ 20.76)                | 63.63 ( $\pm$ 22.59)                | 79.44 ( $\pm$ 20.18)               | 81.86 ( $\pm$ 21.80)                |
| Ratio              | 1.98 ( $\pm$ 0.66)                  | 1.86 ( $\pm$ 0.82)                  | 2.40 ( $\pm$ 0.81)                 | 1.64 ( $\pm$ 0.71)                  |

432

## 433 Discussion

434 Nutritional programming has been shown to improve growth performance in rainbow  
 435 trout [1], yellow perch *Perca flavescens* [6], and gilthead seabream *Sparus aurata* [4,5]. Perera  
 436 and Yufera [7] induced NP during the first three days after mouth opening in zebrafish but did  
 437 not observe any differences in the growth rate during later feeding with soybean meal-based diet.  
 438 An induction of NP with dry feed as suggested by Perera and Yufera [7] in species that requires

439 live food for proper growth, development, and survival, during the first feeding poses a risk of  
440 low or no food consumption defeating the actual NP outcome. We believe that programming  
441 with plant protein using a standard zebrafish rearing protocol utilizing live food as a vector for  
442 soybean meal could be a logical and straightforward approach in helping fish to adapt to this  
443 alternative protein source. Our experiment showed that dietary PP utilization and associated  
444 higher weight gain could potentially be improved in zebrafish with NP induced using live food  
445 as a PP vehicle and/or during zebrafish weaning period with dry PP-based feed. The experiment  
446 showed that after the PP challenge the T-NP group achieved the highest weight gain compared to  
447 both control groups suggesting that NP with dietary PP improves its utilization in zebrafish. The  
448 NP-PP group achieved higher weight gain compared to the negative control, however, no  
449 differences were detected with NP-FM or T-NP groups. It is possible that if the study was  
450 prolonged differences could also be detected between NP-PP and NP-FM groups. However,  
451 since the fish reach sexual maturation after approximately two months after hatching leading to  
452 size discrepancies within tanks and groups, the feeding trial had to be terminated at 66 dph  
453 before an obvious sexual dimorphism started to appear. Another possible scenario is that perhaps  
454 an optimal window exists for fish to respond to NP effectively. The live food used in the study,  
455 rotifers and *Artemia* nauplii, were both enriched with soybean meal and their enrichment status  
456 was assessed by change in body color (Figure 2) and therefore we believe there was an exposure  
457 to PP in larval zebrafish during the first days of feeding. It is possible, however, that fish must  
458 reach a certain developmental stage to be able to positively respond to the imposed nutritional  
459 trigger (such as soybean meal) to better adapt to it at a later age.

460           The available data on hormonal regulation of the gastrointestinal tract in teleosts suggest  
461 that some gastrointestinal hormones not only regulate digestion but also act as appetite/satiety

462 modulating signals in the brain. When *ghrelin* was first discovered in rats it was demonstrated to  
463 be a powerful stimulator of food intake (the first known peripheral hormone with this effect) that  
464 stimulates body weight gain and adiposity in mammals. In the present study, fish brain and  
465 whole digestive tract samples were taken 3- and 24-hours after feeding. In T-NP fish 3-hours  
466 after feeding the level of *ghrelin* in the brain was higher compared to NP-PP and control fish. In  
467 the gut however, the level of *ghrelin* in both “programmed” groups was lower compared to  
468 control (NP-FM) and PP groups. Moreover, the level of *ghrelin* mRNA expression in NP-PP and  
469 T-NP groups 3-hours after feeding was lower compared to fish sampled 24-hours after feeding.  
470 *Ghrelin* in zebrafish is mainly expressed in endocrine pancreatic cells [24] and its higher mRNA  
471 levels have been associated with fasting [25]. The lower *ghrelin* expression level in the gut  
472 observed in our study might possibly indicate fish in “programmed” (NP-PP and T-NP) groups  
473 to be in a satiated (fed) state compared to both controls. In rainbow trout *Oncorhynchus mykiss*  
474 *ghrelin* was shown to have an anorexigenic effect that leads to suppression of food intake.  
475 However, in cyprinids such as goldfish *Carassius auratus*, *ghrelin* was reported to increase food  
476 intake through stimulation of *NPY* and *orexin* neurons in the brain and a potential feedback of  
477 *orexin* on *ghrelin* expression, which might help explain the elevated *ghrelin* levels in the T-NP  
478 fish in zebrafish brain in our study. *Orexin* has been found to stimulate appetite and food  
479 consumption after fasting in different fish species including zebrafish [26-29]. We found *orexin*  
480 expression levels in both brain and gut not significantly different among groups. However, there  
481 was a trend for higher levels of *orexin* in T-NP and PP groups compared to the other groups,  
482 particularly in the brain, possibly supporting the aforementioned assumption about the *orexin*-  
483 related increased *ghrelin* levels in T-NP group in the brain.

484           The role of *NPY* in feed regulation in fish has not been studied extensively but the  
485 available literature indicates that *NPY* in fish has orexigenic effects similar to those observed in  
486 mammals. More specifically, higher levels of *NPY* have been associated with increased food  
487 intake in zebrafish [30]. The *NPY* brain expression levels have been reported higher around  
488 feeding time and lower post-prandially in Chinook salmon *Oncorhynchus tshawytscha*, Coho  
489 salmon *Oncorhynchus kisutch* [31], and in goldfish [32,33] further suggesting a role of *NPY*  
490 as an appetite stimulator consequently being widely considered as one of the most highly  
491 conserved neuropeptides in vertebrates [30]. Our study found *NPY* expression to be higher in the  
492 PP group compared to NP-PP and not different with T-NP and NP-FM groups, suggesting that  
493 perhaps fish in the PP group were in an “unfed” state 3-hours after feeding. Valen et al. [34]  
494 observed higher *NPY* mRNA levels in fed Atlantic salmon *Salmo salar* compared to unfed fish  
495 1.5 and 9-hours after feeding. The authors argued, however, that the increased *NPY* expression  
496 was probably a result of digestive tract feedback since after 9 hours the feed had likely been  
497 evacuated from the digestive tract rendering the fish to be in “unfed” state again.

498           *Leptin* - an antagonist of *ghrelin*, is an anorexigenic hormone released mostly by adipose  
499 tissue in mammals. In fish, *leptin* has been found in liver, brain, muscle, gonads, kidneys, and  
500 other tissues [21,35-37] and its effects on energy metabolism in fish are still perplexing. An  
501 increased postprandial hepatic *leptin* expression have been observed in common carp *Cyprinus*  
502 *carpio* [36] and orange spotted grouper *Epinephelus coioides* [38] confirming its role as a satiety  
503 signal comparable to mammals. Murashita et al. [39] showed reduced growth performance of  
504 juvenile Atlantic salmon after intraperitoneal infusion of recombinant salmon specific *leptin* at a  
505 dose of 10 ng/g/h using implanted micro-osmotic pump over a three-week period. However,  
506 *leptin* response to feeding status varies between species and salmonids show an opposite trend to



507 the mammalian model in which fasting or feed restriction actually leads to decreased *leptin*  
508 levels. Trombley et al. [37] reported 9-fold higher expression levels of hepatic *leptin* and 2.3  
509 times higher plasma *leptin* levels in Atlantic salmon in the feed-restricted group (40% of the  
510 optimal feeding rate) compared to the control group (optimal feeding rate). Similar results were  
511 obtained by Kling et al. [40] who found plasma *leptin* levels to be higher in fasted rainbow trout  
512 compared to fed trout throughout 21 days of the experimental period. In our study, *leptin*  
513 expression in the brain was not significantly different among groups. *Leptin* expression in the gut  
514 was not different between groups 3-hours after feeding suggesting that either a longer time is  
515 required for the *leptin* signal to take effect or the link between diet and *leptin* regulation in  
516 zebrafish is not significant if all the fish receive similar food rations across groups as opposed to  
517 feeding versus starving. This first assumption can be consolidated by the observed rise in *leptin*  
518 mRNA levels in T-NP group 24-hours after feeding compared to 3-hour sampled fish potentially  
519 suggesting fish in T-NP group to be in a satiated state 24-hours after the last meal compared to  
520 all other groups. The second assumption is supported by results obtained by Oka et al. [41] who  
521 found no differences in *leptin* mRNA expression between overfed and control (optimal feeding  
522 rate) zebrafish. Huising et al. [36] reported that hepatic *leptin* expression levels corresponded to  
523 increase in plasma glucose levels 3-hours and 6-hours after feeding in common carp *Cyprinus*  
524 *carpio*. Yet, *leptin* expression was not affected by short-term fasting (six days) nor long-term-  
525 fasting (21 days) even though the latter fish lost 30% of their initial weight towards the end of  
526 the third week. *Leptin*'s role in satiety is supplemented by the actions of both *ghrelin* and *CCK*.  
527 Volkoff et al. [42] found that *CCK* might affect actions of *leptin* in goldfish. Interestingly,  
528 although in our study no differences were detected in *leptin* expression level among groups 3-  
529 hours after feeding, *CCK* expression level was significantly lower in both programmed groups

530 compared to control and negative control in the brain. Similar trend was observed in the gut.  
531 *CCK* has been linked to stimulation of pancreatic enzyme secretion, gallbladder contraction, and  
532 intestinal peristalsis. In the brain *CCK* acts as a neurotransmitter involved in control of appetite  
533 as a satiation signal from the gut. In goldfish, *CCK* has been found to inhibit feed intake [43].  
534 Consequently, decreased *CCK* expression in programmed groups potentially led to enhanced  
535 digestion and nutrient absorption and therefore better growth of fish in those two groups.  
536 However, *CCK* expression in the gut seemed to present a similar trend to *ghrelin* expression  
537 contradicting previous evidence on involvement of *ghrelin* in suppression of *CCK* anorexic  
538 effect in goldfish [44]. Although the majority of studies on several fish species indicate that  
539 fasting decreases *CCK* expression in the gut [45-50] the role of *CCK* response to fasting/feeding  
540 is species-, tissue-, and time-dependent [51]. For example, Macdonald and Volkoff [52] showed  
541 an increase in *CCK* expression in the gut after two weeks of fasting in winter skate *Raja ocellata*  
542 but no effect was detected in the brain. *CCK* has also been shown to differ between gastric and  
543 agastric fish species such as ballan wrasse *Labrus bergylta* [53]. The decreased expression of  
544 *CCK* in NP-PP and T-NP groups could also indicate these fish were actually in “starvation”  
545 compared to both control groups - an alternative scenario to the earlier statement on *CCK* status  
546 in our experiment. However, this speculation contradicts previous results presented for *ghrelin*,  
547 *orexin*, *NPY*, and *leptin* and therefore the results remain perplexing and suggest further  
548 investigation on the effects of nutritional status on the expression of *CCK* in zebrafish.

549 Soybean meal is the most commonly used PP source in aquaculture feeds, but its use has  
550 been limited due to its negative effects at higher dietary inclusion rates that lead to reduced  
551 growth and an intestinal inflammation [54]. Typical signs of dietary PP-induced inflammation in  
552 the intestinal mucosa include thickening of lamina propria and sub-epithelial mucosa; infiltration

553 of inflammatory cells; and increased number of goblet cells in the epithelium; as well as  
554 shortening of the mucosal folds and hence, reduced absorptive capacity of the enterocytes lining  
555 the intestinal epithelium [19]. An increase in intestinal villi length has been associated with  
556 higher absorption of available nutrients due to increased surface area. However, assessment of  
557 villi length only does not consider variations in the surface area due to changes in intestinal villi  
558 width and consequently a ratio of intestinal villus length to width is commonly used. Our  
559 histological results revealed that the highest villus length to villus width ratio in the proximal  
560 intestine was found in T-NP and NP-FM groups compared to both NP-PP and PP groups.  
561 However, in the middle intestine the T-NP group had the highest villus length to villus width  
562 ratio compared to all other groups. Based on the differences in morphology and cell  
563 differentiation and function, Ng et al. [55] proposed that zebrafish intestinal tract should be  
564 divided into three distinct segments: the intestinal bulb (proximal intestine), middle intestine, and  
565 distal intestine. The digestive processes mostly occur in proximal and middle segments where  
566 absorptive enterocytes, digestive enzymes, and solute transporters are highly concentrated, while  
567 the distal region is likely involved in water and iron absorption [55,56]. Our results could  
568 therefore suggest that increased villus length to width ratio in T-NP group could be a result of  
569 morphological adaptation of the intestine allowing for more efficient dietary soybean meal  
570 digestion and nutrient absorption. Wang et al. [16] reported that 100% dietary fishmeal  
571 replacement with soybean meal led to inflammatory response manifested by significant reduction  
572 in intestinal villi length, width, and length to width ratio similar to the results obtained in our  
573 negative control group. The intestinal inflammation caused by presence of anti-nutritional factors  
574 in dietary soybean meal has been studied in both carnivorous and omnivorous species [14-

575 16,57,58] where zebrafish has been suggested as a model species due to presence of similar  
576 inflammatory responses after ingestion of different plant-based ingredients [10].

## 577 **Conclusions**

578 Our study found that zebrafish is able to utilize PP-based diets more efficiently for  
579 growth when exposed to the same PP source early in life. This study also proposes that NP  
580 should probably be induced when fish are already in a juvenile stage when all the organs and  
581 systems are fully present to be able to respond to this early nutritional trigger more effectively.  
582 Finally, our study suggests that the mechanism behind NP might be associated with endocrine  
583 and morphological adaptation of the digestive system that leads to enhanced digestion and  
584 absorption capacity ultimately reflected by improved growth.

## 585 **Acknowledgments**

586 We thank Saffron Scientific Histology Services (Carbondale, IL) for providing excellent  
587 histological services in a timely manner.

## 588 **Author contributions**

589 Experimental conception and design: KK MW. Experiment management and execution:  
590 MW KK. Data analyses: GT, VJM, FI, GSM. Writing (original draft): KK. Writing (review and  
591 edit): KK MW GT VJM GSM.

## 592 **References**

- 593 1. Geurden I, Borchert P, Balasubramanian MN, Schrama JW, Dupont-Nivet M, Quillet E,  
594 Kaushik SJ, Panserat S, Médale F. The positive impact of the early-feeding of a plant-  
595 based diet on its future acceptance and utilisation in rainbow trout. PLoS One. 2013 Dec  
596 27;8(12):e83162  
597

- 598 2. Vagner M, Infante JZ, Robin JH, Person-Le Ruyet J. Is it possible to influence European  
599 sea bass (*Dicentrarchus labrax*) juvenile metabolism by a nutritional conditioning during  
600 larval stage? *Aquaculture*. 2007 Jul 3;267(1-4):165-74.  
601
- 602 3. Vagner M, Robin JH, Zambonino-Infante JL, Tocher DR, Person-Le Ruyet J. Ontogenic  
603 effects of early feeding of sea bass (*Dicentrarchus labrax*) larvae with a range of dietary  
604 n-3 highly unsaturated fatty acid levels on the functioning of polyunsaturated fatty acid  
605 desaturation pathways. *British journal of nutrition*. 2009 May;101(10):1452-62.  
606
- 607 4. Izquierdo MS, Turkmen S, Montero D, Zamorano MJ, Afonso JM, Karalazos V,  
608 Fernández-Palacios H. Nutritional programming through broodstock diets to improve  
609 utilization of very low fishmeal and fish oil diets in gilthead sea bream. *Aquaculture*.  
610 2015 Dec 1;449:18-26.  
611
- 612 5. Turkmen S, Zamorano MJ, Fernández-Palacios H, Hernández-Cruz CM, Montero D,  
613 Robaina L, Izquierdo M. Parental nutritional programming and a reminder during  
614 juvenile stage affect growth, lipid metabolism and utilisation in later developmental  
615 stages of a marine teleost, the gilthead sea bream (*Sparus aurata*). *British Journal of*  
616 *Nutrition*. 2017 Oct;118(7):500-12.  
617
- 618 6. Kemski M, Wick M, Dabrowski K. Nutritional programming effects on growth and  
619 reproduction of broodstock and embryonic development of progeny in yellow perch  
620 (*Perca flavescens*) fed soybean meal-based diets. *Aquaculture*. 2018 Dec 1;497:452-61.  
621
- 622 7. Perera E, Yúfera M. Soybean meal and soy protein concentrate in early diet elicit  
623 different nutritional programming effects on juvenile zebrafish. *Zebrafish*. 2016 Feb  
624 1;13(1):61-9.  
625
- 626 8. London RM, Snowdon CT, Smithana JM. Early experience with sour and bitter solutions  
627 increases subsequent ingestion. *Physiology & behavior*. 1979 Jun 1;22(6):1149-55.  
628
- 629 9. Balasubramanian MN, Panserat S, Dupont-Nivet M, Quillet E, Montfort J, Le Cam A,  
630 Medale F, Kaushik SJ, Geurden I. Molecular pathways associated with the nutritional  
631 programming of plant-based diet acceptance in rainbow trout following an early feeding  
632 exposure. *BMC genomics*. 2016 Dec;17(1):449.  
633
- 634 10. Hedrera MI, Galdames JA, Jimenez-Reyes MF, Reyes AE, Avendaño-Herrera R, Romero  
635 J, Feijóo CG. Soybean meal induces intestinal inflammation in zebrafish larvae. *PLoS*  
636 *One*. 2013 Jul 23;8(7):e69983.  
637
- 638 11. Baeverfjord G, Krogdahl Å. Development and regression of soybean meal induced  
639 enteritis in Atlantic salmon, *Salmo salar* L., distal intestine: a comparison with the  
640 intestines of fasted fish. *Journal of Fish Diseases*. 1996 Sep;19(5):375-87.  
641

- 642 12. Urán PA, Gonçalves AA, Taverne-Thiele JJ, Schrama JW, Verreth JA, Rombout JH.  
643 Soybean meal induces intestinal inflammation in common carp (*Cyprinus carpio* L.). *Fish*  
644 & shellfish immunology. 2008 Dec 1;25(6):751-60.  
645
- 646 13. Urán PA, Schrama JW, Rombout JH, Obach A, Jensen L, Koppe W, Verreth JA.  
647 Soybean meal-induced enteritis in Atlantic salmon (*Salmo salar* L.) at different  
648 temperatures. *Aquaculture Nutrition*. 2008 Aug;14(4):324-30.  
649
- 650 14. de Francesco M, Parisi G, Médale F, Lupi P, Kaushik SJ, Poli BM. Effect of long-term  
651 feeding with a plant protein mixture-based diet on growth and body/fillet quality traits of  
652 large rainbow trout (*Oncorhynchus mykiss*). *Aquaculture*. 2004 Jun 14;236(1-4):413-29.  
653
- 654 15. Fontainhas-Fernandes A, Gomes E, Reis-Henriques MA, Coimbra J. Replacement of fish  
655 meal by plant proteins in the diet of Nile tilapia: digestibility and growth performance.  
656 *Aquaculture International*. 1999 Jan 1;7(1):57-67.  
657
- 658 16. Wang YR, Wang L, Zhang CX, Song K. Effects of substituting fishmeal with soybean  
659 meal on growth performance and intestinal morphology in orange-spotted grouper  
660 (*Epinephelus coioides*). *Aquaculture Reports*. 2017 Feb 1;5:52-7.  
661
- 662 17. Kasper CS, Watkins BA, Brown PB. Evaluation of two soybean meals fed to yellow  
663 perch (*Perca flavescens*). *Aquaculture Nutrition*. 2007 Dec;13(6):431-8.  
664
- 665 18. Marjara IS, Chikwati EM, Valen EC, Krogdahl Å, Bakke AM. Transcriptional regulation  
666 of IL-17A and other inflammatory markers during the development of soybean meal-  
667 induced enteropathy in the distal intestine of Atlantic salmon (*Salmo salar* L.). *Cytokine*.  
668 2012 Oct 1;60(1):186-96.  
669
- 670 19. Booman M, Forster I, Vederas JC, Groman DB, Jones SR. Soybean meal-induced  
671 enteritis in Atlantic salmon (*Salmo salar*) and Chinook salmon (*Oncorhynchus*  
672 *tshawytscha*) but not in pink salmon (*O. gorbuscha*). *Aquaculture*. 2018 Jan 20;483:238-  
673 43.  
674
- 675 20. Buddington RK, Krogdahl Å. Hormonal regulation of the fish gastrointestinal tract.  
676 *Comparative Biochemistry and Physiology Part A: Molecular & Integrative Physiology*.  
677 2004 Nov 1;139(3):261-71.  
678
- 679 21. Rønnestad I, Gomes AS, Murashita K, Angotzi R, Jönsson E, Volkoff H. Appetite-  
680 controlling endocrine systems in teleosts. *Frontiers in endocrinology*. 2017 Apr 18;8:73.  
681
- 682 22. Ulloa PE, Iturra P, Neira R, Araneda C. Zebrafish as a model organism for nutrition and  
683 growth: towards comparative studies of nutritional genomics applied to aquacultured  
684 fishes. *Reviews in Fish Biology and Fisheries*. 2011 Dec 1;21(4):649-66.  
685

- 686 23. Karimi K, Zhandi M. The effect of  $\beta$ -mannanase and  $\beta$ -glucanase on small intestine  
687 morphology in male broilers fed diets containing various levels of metabolizable energy.  
688 Journal of applied animal research. 2015 Jul 3;43(3):324-9.  
689
- 690 24. Eom J, Hong M, Cone RD, Song Y. Zebrafish ghrelin is expressed in pancreatic  
691 endocrine cells and regulated by metabolic state. Biochemical and biophysical research  
692 communications. 2013 Sep 13;439(1):115-20  
693
- 694 25. Amole N, Unniappan S. Fasting induces preproghrelin mRNA expression in the brain and  
695 gut of zebrafish, *Danio rerio*. General and comparative endocrinology. 2009 Mar  
696 1;161(1):133-7.  
697
- 698 26. Novak CM, Jiang X, Wang C, Teske JA, Kotz CM, Levine JA. Caloric restriction and  
699 physical activity in zebrafish (*Danio rerio*). Neuroscience letters. 2005 Jul 22;383(1-  
700 2):99-104.
- 701 27. Nakamachi T, Matsuda K, Maruyama K, Miura T, Uchiyama M, Funahashi H, Sakurai T,  
702 Shioda S. Regulation by orexin of feeding behaviour and locomotor activity in the  
703 goldfish. Journal of neuroendocrinology. 2006 Apr;18(4):290-7.  
704
- 705 28. Xu M, Volkoff H. Molecular characterization of prepro-orexin in Atlantic cod (*Gadus*  
706 *morhua*): cloning, localization, developmental profile and role in food intake regulation.  
707 Molecular and cellular endocrinology. 2007 Jun 15;271(1-2):28-37  
708
- 709 29. Buckley C, MacDonald EE, Tuziak SM, Volkoff H. Molecular cloning and  
710 characterization of two putative appetite regulators in winter flounder (*Pleuronectes*  
711 *americanus*): preprothyrotropin-releasing hormone (TRH) and preproorexin (OX).  
712 Peptides. 2010 Sep 1;31(9):1737-47.  
713
- 714 30. Yokobori E, Azuma M, Nishiguchi R, Kang KS, Kamijo M, Uchiyama M, Matsuda K.  
715 Neuropeptide Y stimulates food intake in the zebrafish, *Danio rerio*. Journal of  
716 neuroendocrinology. 2012 May;24(5):766-73.  
717
- 718 31. Silverstein JT, Breininger J, Baskin DG, Plisetskaya EM. Neuropeptide Y-like gene  
719 expression in the salmon brain increases with fasting. General and comparative  
720 endocrinology. 1998 May 1;110(2):157-65.  
721
- 722 32. Narnaware YK, Peyon PP, Lin X, Peter RE. Regulation of food intake by neuropeptide Y  
723 in goldfish. American Journal of Physiology-Regulatory, Integrative and Comparative  
724 Physiology. 2000 Sep 1;279(3):R1025-34.  
725
- 726 33. Narnaware YK, Peter RE. Neuropeptide Y stimulates food consumption through multiple  
727 receptors in goldfish. Physiology & behavior. 2001 Sep 1;74(1-2):185-90.  
728
- 729 34. Valen R, Jordal AE, Murashita K, Rønnestad I. Postprandial effects on appetite-related  
730 neuropeptide expression in the brain of Atlantic salmon, *Salmo salar*. General and  
731 comparative endocrinology. 2011 May 1;171(3):359-66.

- 732  
733 35. Kurokawa T, Murashita K, Suzuki T, Uji S. Genomic characterization and tissue  
734 distribution of leptin receptor and leptin receptor overlapping transcript genes in the  
735 pufferfish, *Takifugu rubripes*. *General and comparative endocrinology*. 2008 Aug  
736 1;158(1):108-14.  
737
- 738 36. Huising MO, Geven EJ, Kruiswijk CP, Nabuurs SB, Stolte EH, Spanings FT, Verburg-  
739 van Kemenade BL, Flik G. Increased leptin expression in common carp (*Cyprinus*  
740 *carpio*) after food intake but not after fasting or feeding to satiation. *Endocrinology*. 2006  
741 Dec 1;147(12):5786-97.  
742
- 743 37. Trombley S, Maugars G, Kling P, Björnsson BT, Schmitz M. Effects of long-term  
744 restricted feeding on plasma leptin, hepatic leptin expression and leptin receptor  
745 expression in juvenile Atlantic salmon (*Salmo salar* L.). *General and comparative*  
746 *endocrinology*. 2012 Jan 1;175(1):92-9.  
747
- 748 38. Zhang H, Chen H, Zhang Y, Li S, Lu D, Zhang H, Meng Z, Liu X, Lin H. Molecular  
749 cloning, characterization and expression profiles of multiple leptin genes and a leptin  
750 receptor gene in orange-spotted grouper (*Epinephelus coioides*). *General and comparative*  
751 *endocrinology*. 2013 Jan 15;181:295-305.  
752
- 753 39. Murashita K, Jordal AE, Nilsen TO, Stefansson SO, Kurokawa T, Björnsson BT, Moen  
754 AG, Rønnestad I. Leptin reduces Atlantic salmon growth through the central pro-  
755 opiomelanocortin pathway. *Comparative Biochemistry and Physiology Part A: Molecular*  
756 *& Integrative Physiology*. 2011 Jan 1;158(1):79-86.  
757
- 758 40. Kling P, Rønnestad I, Stefansson SO, Murashita K, Kurokawa T, Björnsson BT. A  
759 homologous salmonid leptin radioimmunoassay indicates elevated plasma leptin levels  
760 during fasting of rainbow trout. *General and comparative endocrinology*. 2009 Jul  
761 1;162(3):307-12.  
762
- 763 41. Oka T, Nishimura Y, Zang L, Hirano M, Shimada Y, Wang Z, Umemoto N, Kuroyanagi  
764 J, Nishimura N, Tanaka T. Diet-induced obesity in zebrafish shares common  
765 pathophysiological pathways with mammalian obesity. *BMC physiology*. 2010  
766 Dec;10(1):21.  
767
- 768 42. Volkoff H, Eykelbosh AJ, Peter RE. Role of leptin in the control of feeding of goldfish  
769 *Carassius auratus*: interactions with cholecystokinin, neuropeptide Y and orexin A, and  
770 modulation by fasting. *Brain research*. 2003 May 16;972(1-2):90-109.  
771
- 772 43. Himick BA, Peter RE. CCK/gastrin-like immunoreactivity in brain and gut, and CCK  
773 suppression of feeding in goldfish. *American Journal of Physiology-Regulatory,*  
774 *Integrative and Comparative Physiology*. 1994 Sep 1;267(3):R841-51.  
775
- 776 44. Blanco AM, Bertucci JI, Valenciano AI, Delgado MJ, Unniappan S. Ghrelin suppresses  
777 cholecystokinin (CCK), peptide YY (PYY) and glucagon-like peptide-1 (GLP-1) in the



- 778 intestine, and attenuates the anorectic effects of CCK, PYY and GLP-1 in goldfish  
779 (Carassius auratus). *Hormones and behavior*. 2017 Jul 1;93:62-71.  
780
- 781 45. Koven W, Schulte P. The effect of fasting and refeeding on mRNA expression of PepT1  
782 and gastrointestinal hormones regulating digestion and food intake in zebrafish (*Danio*  
783 *rerio*). *Fish physiology and biochemistry*. 2012 Dec 1;38(6):1565-75.  
784
- 785 46. MacDonald E, Volkoff H. Cloning, distribution and effects of season and nutritional  
786 status on the expression of neuropeptide Y (NPY), cocaine and amphetamine regulated  
787 transcript (CART) and cholecystokinin (CCK) in winter flounder (*Pseudopleuronectes*  
788 *americanus*). *Hormones and behavior*. 2009 Jun 1;56(1):58-65.  
789
- 790 47. Murashita K, Fukada H, Hosokawa H, Masumoto T. Cholecystokinin and peptide Y in  
791 yellowtail (*Seriola quinqueradiata*): molecular cloning, real-time quantitative RT-PCR,  
792 and response to feeding and fasting. *General and comparative endocrinology*. 2006 Feb  
793 1;145(3):287-97.  
794
- 795 48. Yuan D, Wang T, Zhou C, Lin F, Chen H, Wu H, Wei R, Xin Z, Li Z. Leptin and  
796 cholecystokinin in *Schizothorax prenanti*: molecular cloning, tissue expression, and  
797 mRNA expression responses to prandial changes and fasting. *General and*  
798 *comparative endocrinology*. 2014 Aug 1;204:13-24.  
799
- 800 49. Ji W, Ping HC, Wei KJ, Zhang GR, Shi ZC, Yang RB, Zou GW, Wang WM. Ghrelin,  
801 neuropeptide Y (NPY) and cholecystokinin (CCK) in blunt snout bream (*Megalobrama*  
802 *amblycephala*): cDNA cloning, tissue distribution and mRNA expression changes  
803 responding to fasting and refeeding. *General and comparative endocrinology*. 2015 Nov  
804 1;223:108-19.  
805
- 806 50. Babaei S, Sáez A, Caballero-Solares A, Fernández F, Baanante IV, Metón I. Effect of  
807 dietary macronutrients on the expression of cholecystokinin, leptin, ghrelin and  
808 neuropeptide Y in gilthead sea bream (*Sparus aurata*). *General and comparative*  
809 *endocrinology*. 2017 Jan 1;240:121-8.  
810
- 811 51. Dalmolin C, Almeida DV, Figueiredo MA, Marins LF. Food intake and appetite control  
812 in a GH-transgenic zebrafish. *Fish physiology and biochemistry*. 2015 Oct 1;41(5):1131-  
813 41.  
814
- 815 52. MacDonald E, Volkoff H. Neuropeptide Y (NPY), cocaine-and amphetamine-regulated  
816 transcript (CART) and cholecystokinin (CCK) in winter skate (*Raja ocellata*): cDNA  
817 cloning, tissue distribution and mRNA expression responses to fasting. *General and*  
818 *comparative endocrinology*. 2009 Apr 1;161(2):252-61.  
819
- 820 53. Le HT, Lie KK, Giroud-Argoud J, Rønnestad I, Sæle Ø. Effects of Cholecystokinin  
821 (CCK) on Gut Motility in the Stomachless Fish Ballan Wrasse (*Labrus bergylta*).  
822 *Frontiers in neuroscience*. 2019;13.  
823

- 824 54. Krogdahl Å, Gajardo K, Kortner TM, Penn M, Gu M, Berge GM, Bakke AM. Soya  
825 saponins induce enteritis in Atlantic salmon (*Salmo salar* L.). *Journal of agricultural and*  
826 *food chemistry*. 2015 Apr 10;63(15):3887-902.  
827
- 828 55. Ng AN, de Jong-Curtain TA, Mawdsley DJ, White SJ, Shin J, Appel B, Dong PD,  
829 Stainier DY, Heath JK. Formation of the digestive system in zebrafish: III. Intestinal  
830 epithelium morphogenesis. *Developmental biology*. 2005 Oct 1;286(1):114-35.  
831
- 832 56. Wallace KN, Pack M. Unique and conserved aspects of gut development in zebrafish.  
833 *Developmental biology*. 2003 Mar 1;255(1):12-29.  
834
- 835 57. Bakke-McKellep AM, Press CM, Baeverfjord G, Krogdahl Å, Landsverk T. Changes in  
836 immune and enzyme histochemical phenotypes of cells in the intestinal mucosa of  
837 Atlantic salmon, *Salmo salar* L., with soybean meal-induced enteritis. *Journal of Fish*  
838 *Diseases*. 2000 Mar;23(2):115-27.  
839
- 840 58. Krogdahl A, Bakke-McKellep AM, Roed KH, Baeverfjord G. Feeding Atlantic salmon  
841 *Salmo salar* L. soybean products: effects on disease resistance (furunculosis), and  
842 lysozyme and IgM levels in the intestinal mucosa. *Aquaculture Nutrition*. 2000 Jun  
843 1;6(2):77-84.  
844

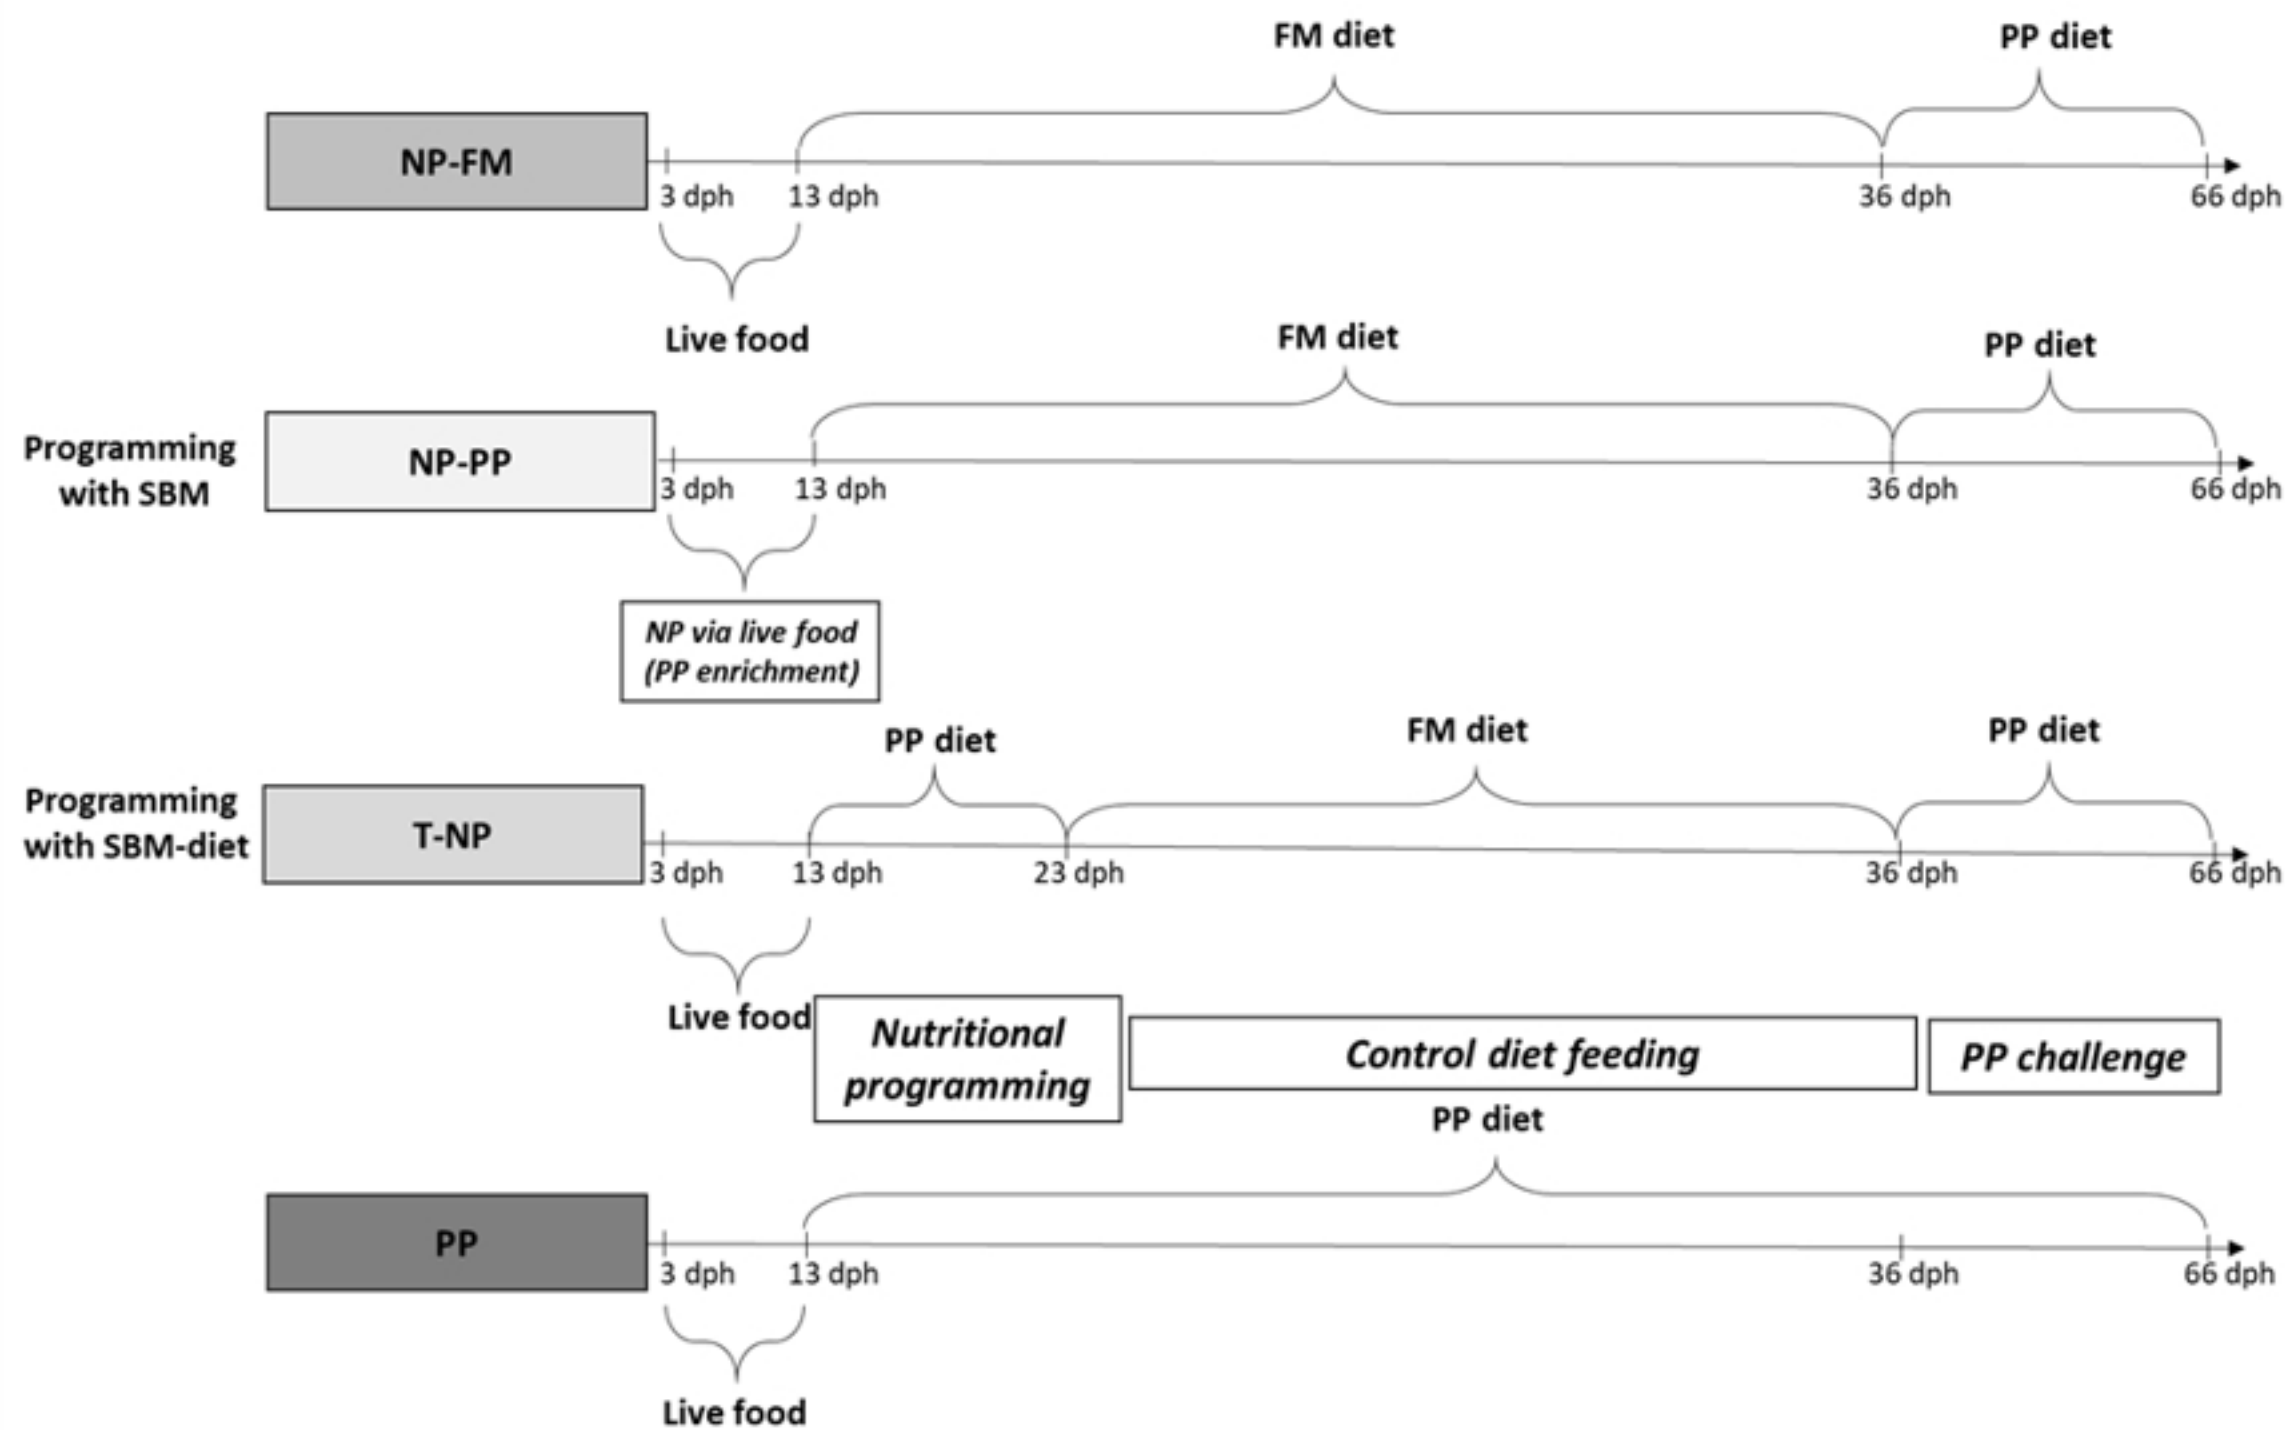

Fig 1

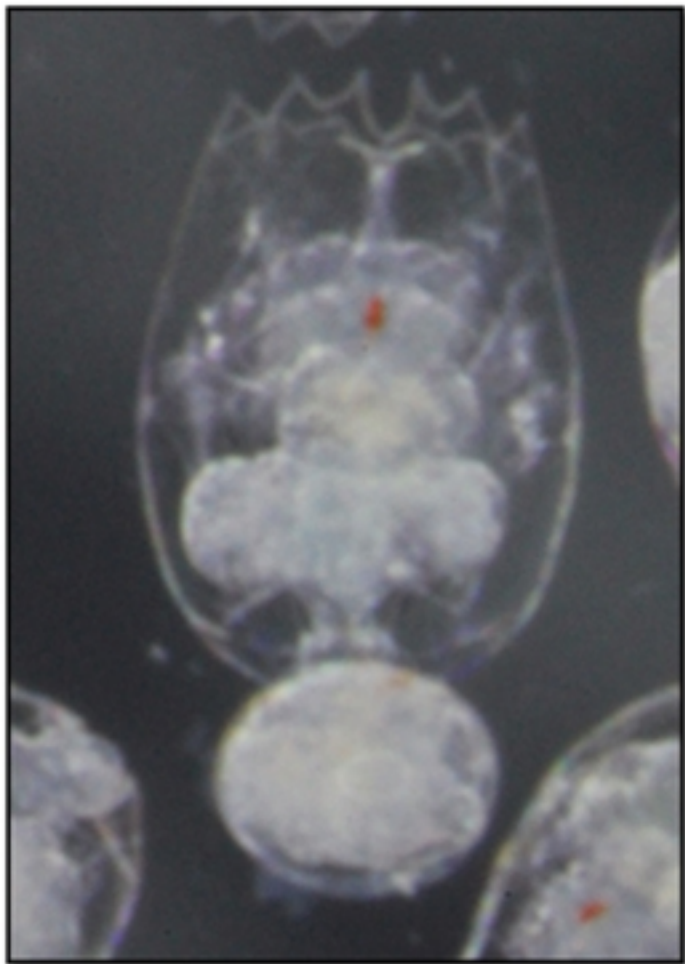

**Starved**

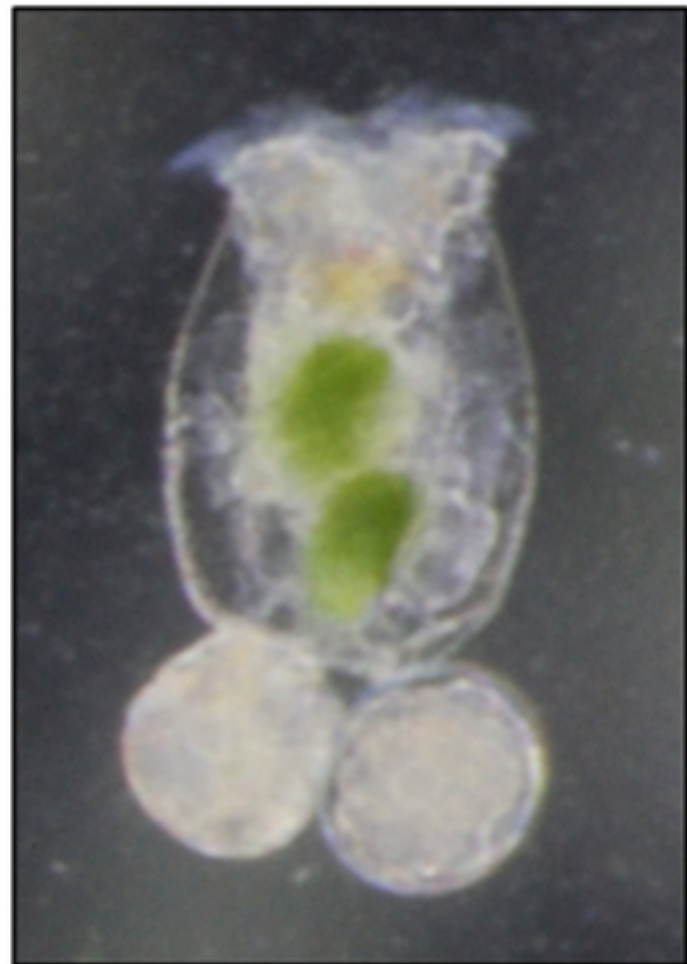

**Spirulina fed**

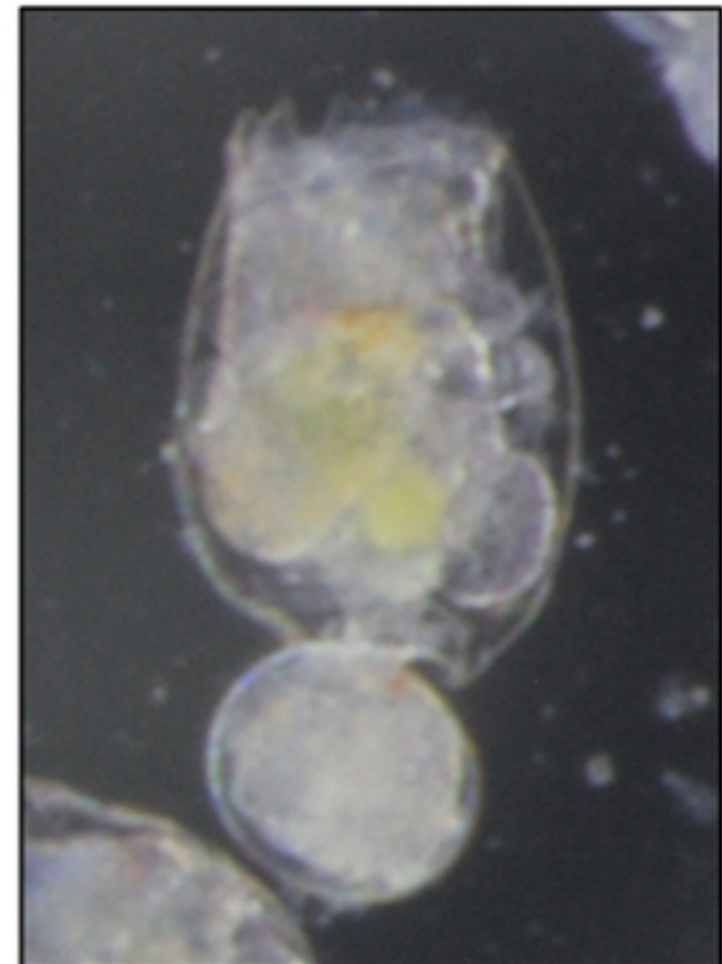

**Soybean meal fed**

Fig 2

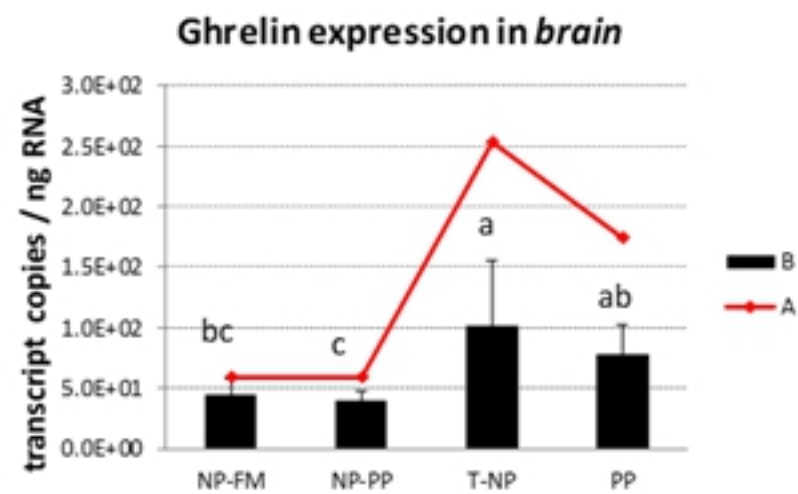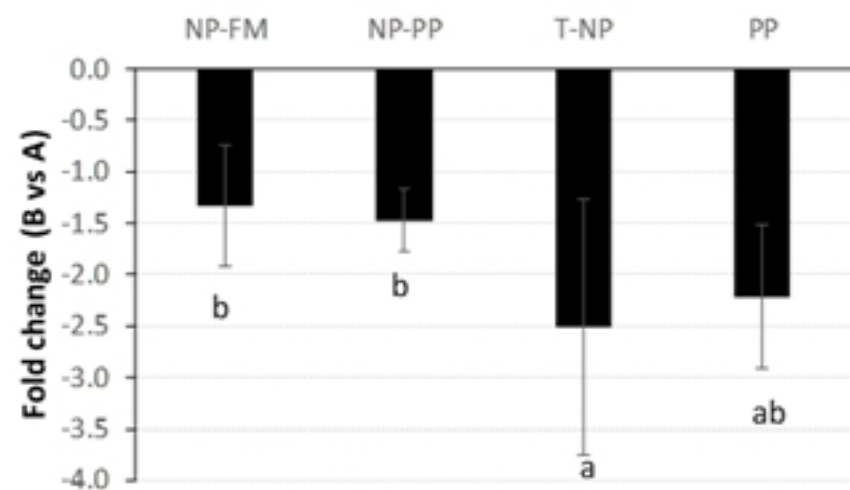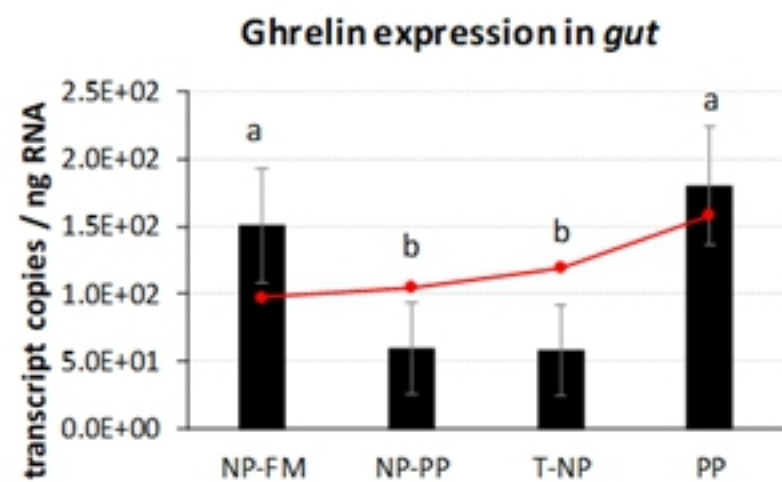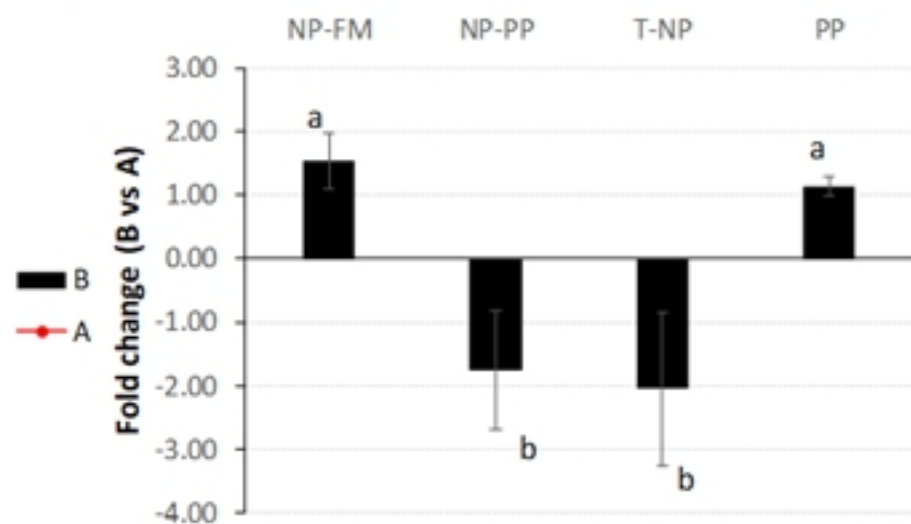

Fig 3

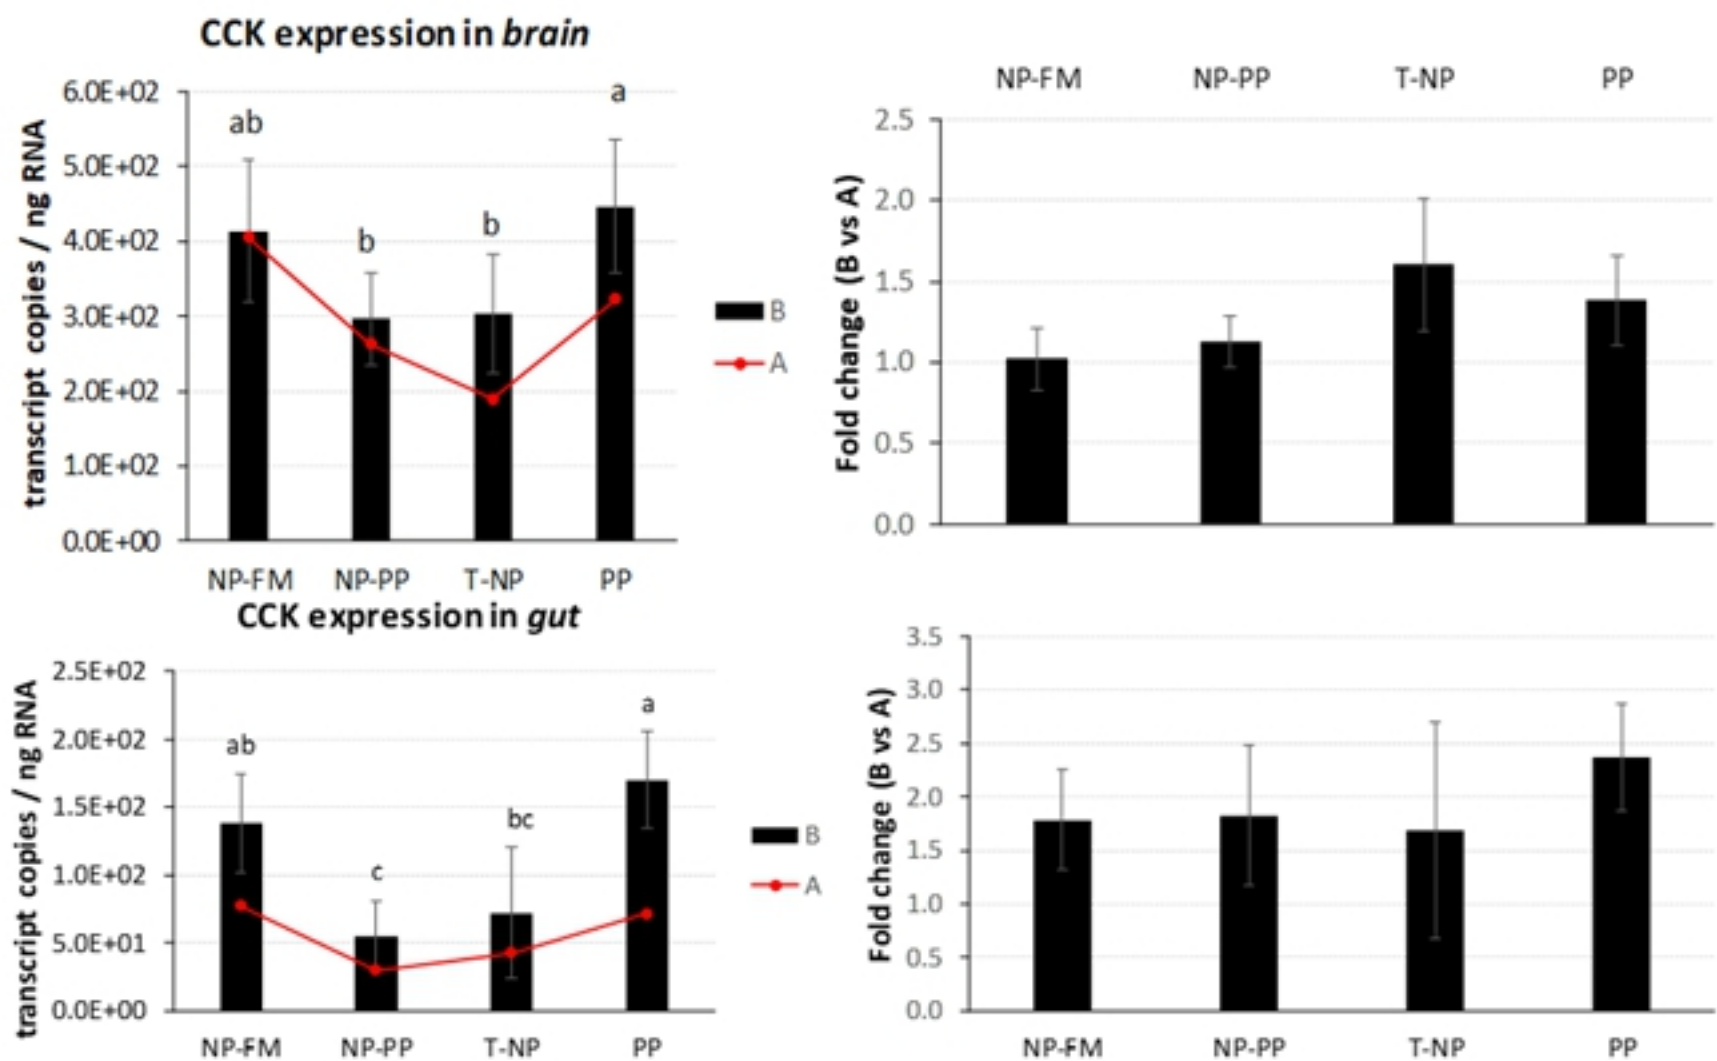

Fig 4

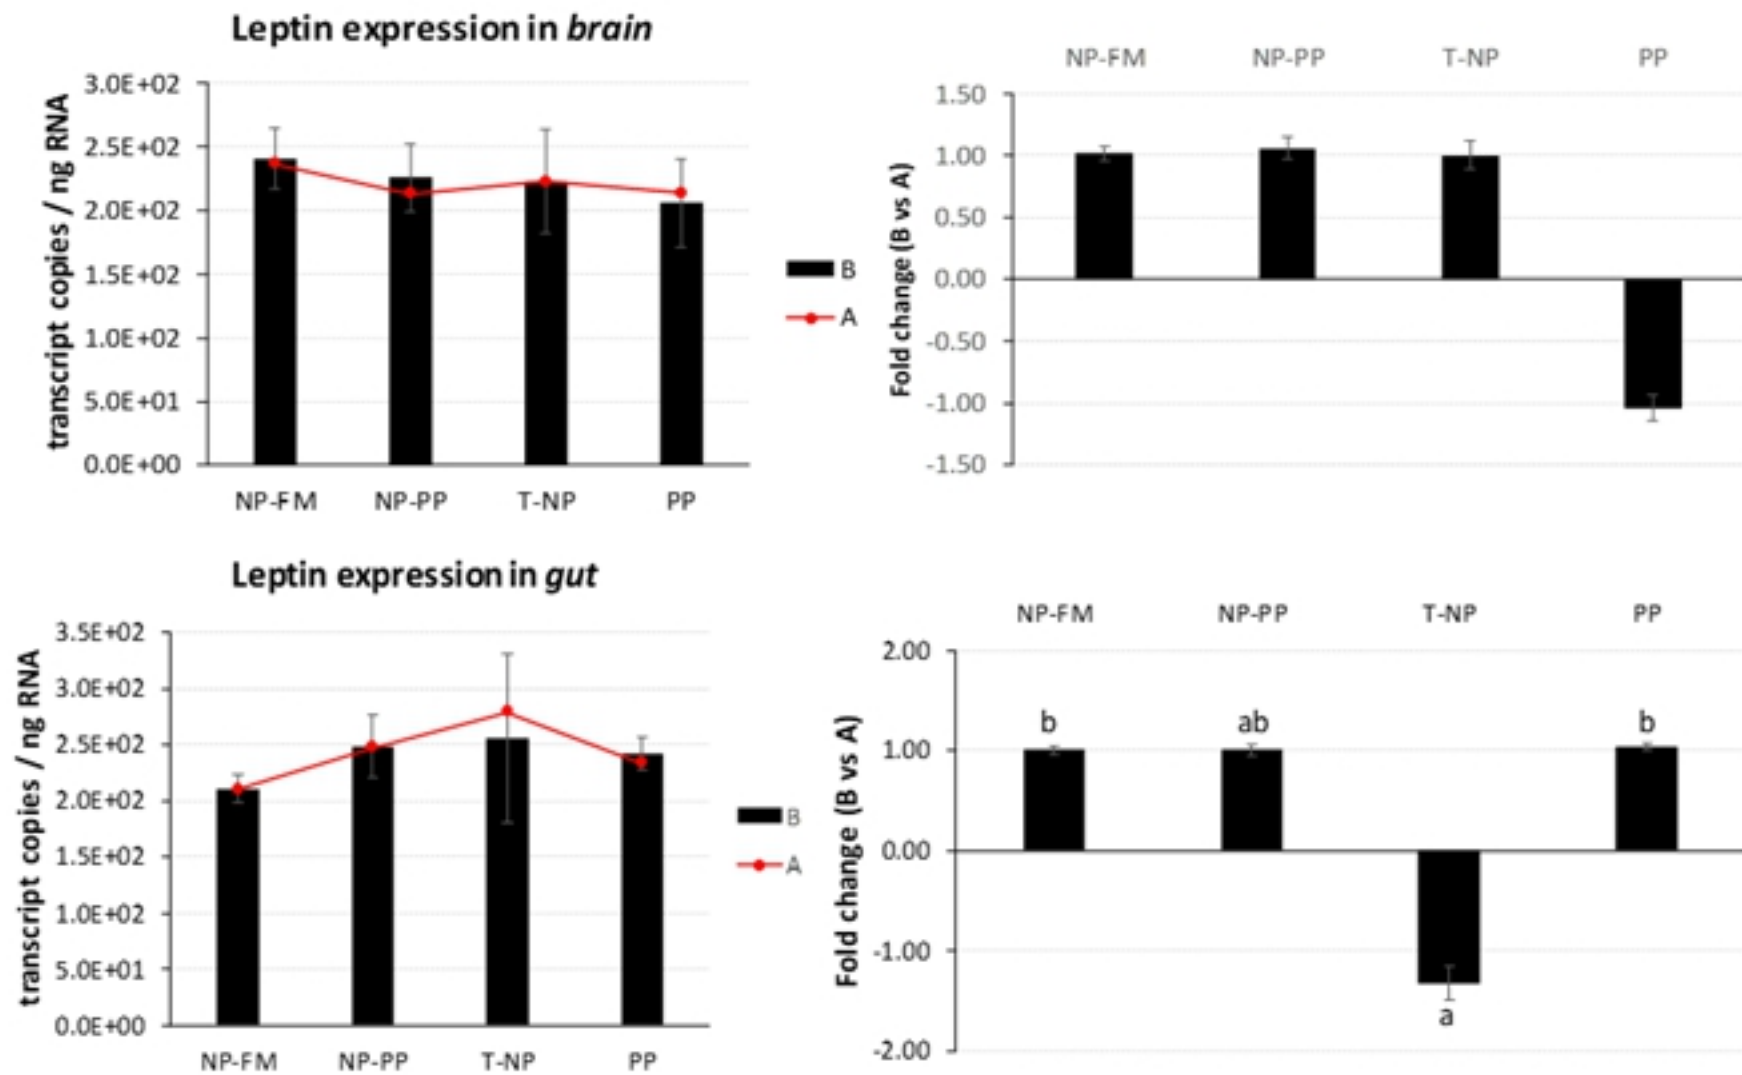

Fig 5

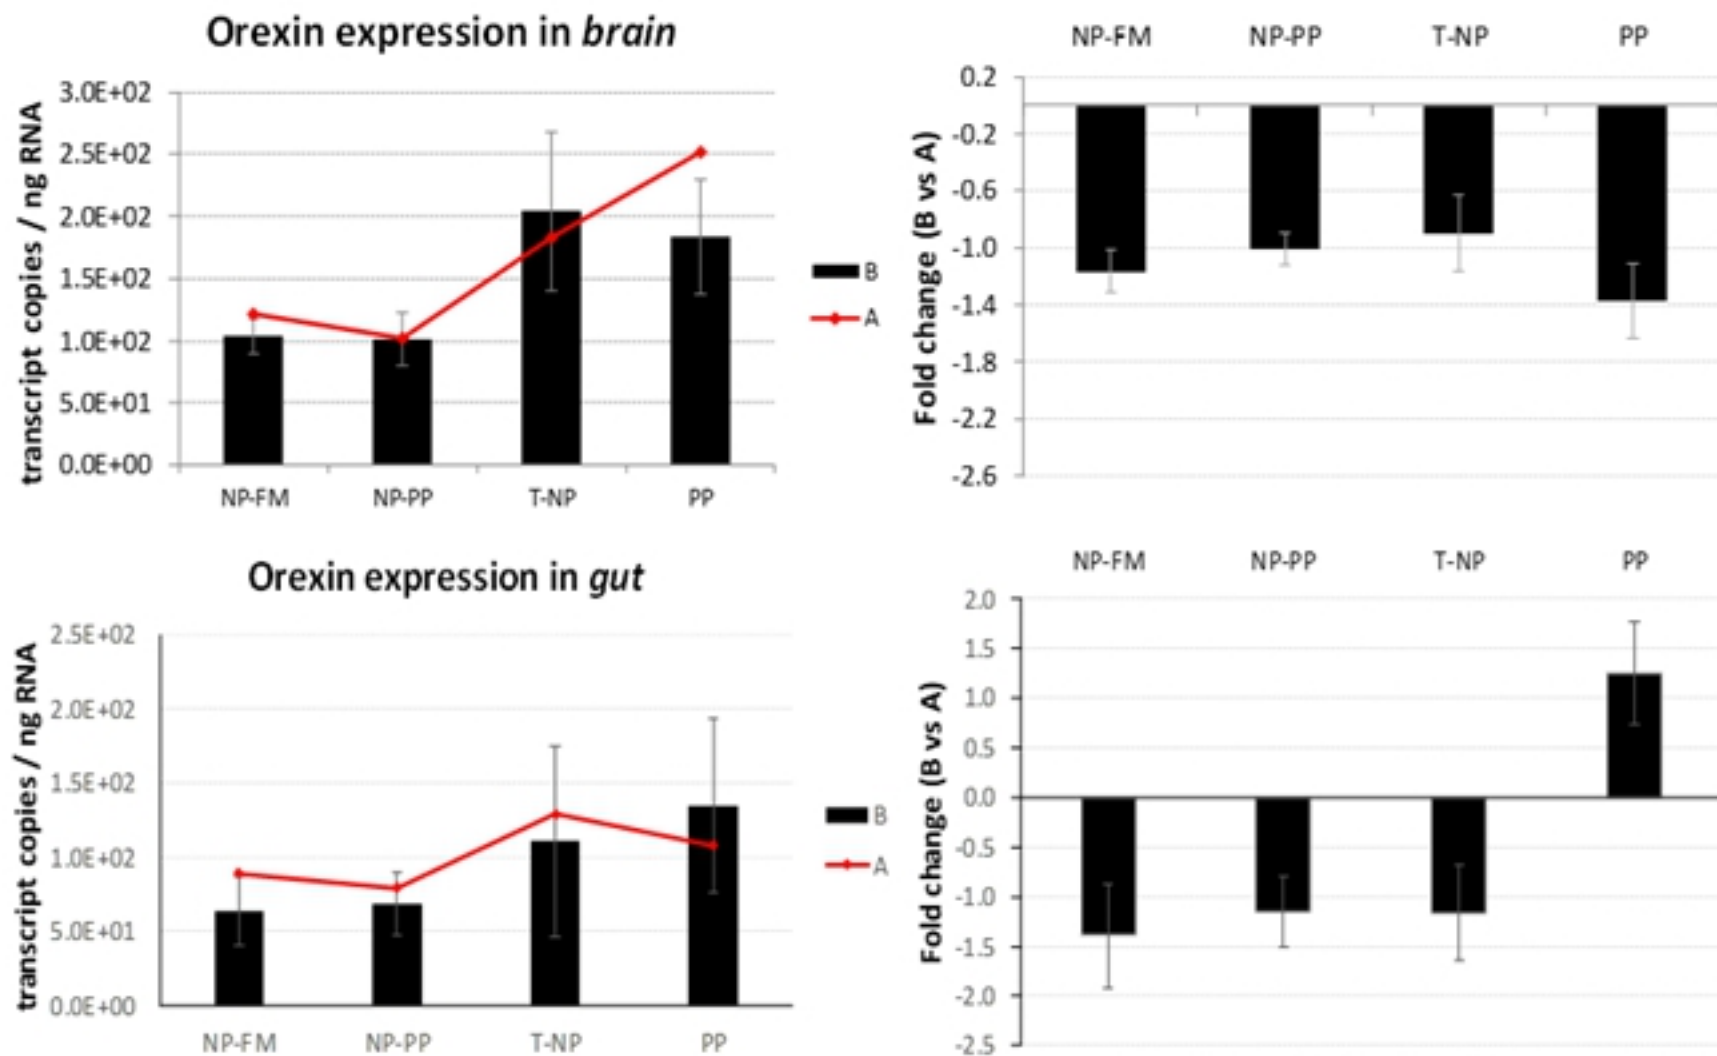

Fig 6



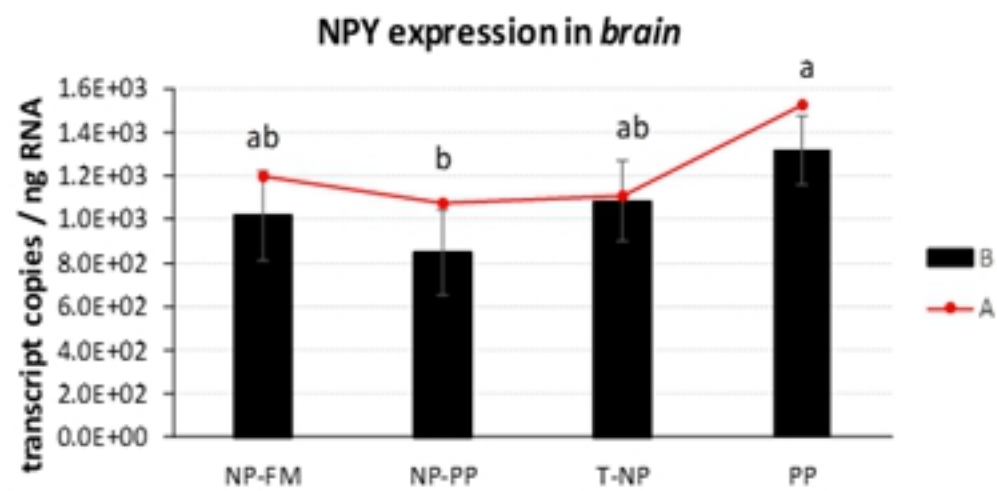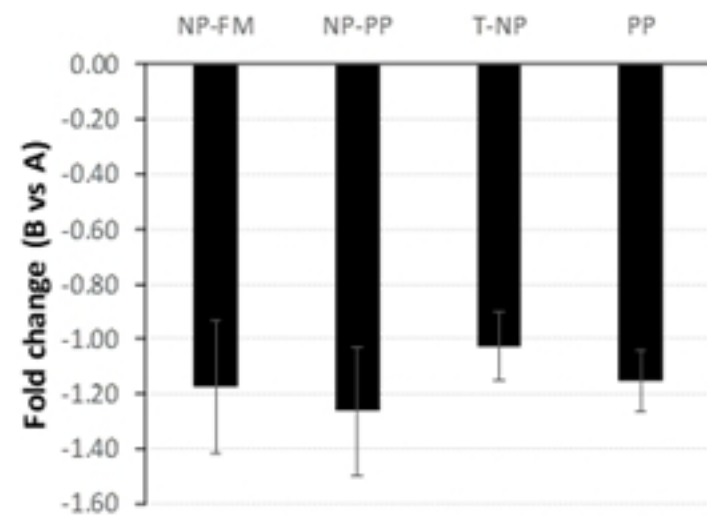

Fig 7
